# Supplementary material for: Photoexcited sulfenylation of C(sp3)–H bonds in amides using thiosulfonates
Source: Royal Society of Chemistry journal article supplement (doi:10.1039/d2ob00557c), 2022-01-01
Supplement: d2ob00557c1.pdf [file d2ob00557c1.pdf]

## Supplementary Information

### Photoexcited sulfenylation of C(sp<sup>3</sup>)-H bonds in amides using thiosulfonates

**Wen-Zhu Bi,<sup>\*a</sup> Wen-Jie Zhang,<sup>a</sup> Chen-Yu Li,<sup>a</sup> Lu-Hao Shao,<sup>a</sup> Qing-Pu Liu,<sup>a</sup> Su-Xiang Feng,<sup>\*b,c</sup> Yang Geng,<sup>\*d</sup> Xiao-Lan Chen<sup>e</sup> and Ling-Bo Qu<sup>e</sup>**

<sup>a</sup> School of Pharmacy, Henan University of Chinese Medicine, Zhengzhou, 450046, China.

<sup>b</sup> Academy of Chinese Medical Sciences, Henan University of Chinese Medicine, Zhengzhou, 450046, China. E-mail: fengsx221@163.com

<sup>c</sup> Collaborative Innovation Center for Chinese Medicine and Respiratory Diseases co-constructed by Henan province & Education Ministry of P. R. China, Zhengzhou, 450046, China

<sup>d</sup> Department of Pharmacy, Zhengzhou Railway Vocational and Technical College, Zhengzhou, 450046, China. E-mail: gengyang0001@163.com

<sup>e</sup> College of Chemistry, Zhengzhou University, Zhengzhou, 450052, China.

Corresponding E-mail: [biwenzhu2018@hactcm.edu.cn](mailto:biwenzhu2018@hactcm.edu.cn)

### Table of Contents

|                                                                                          |            |
|------------------------------------------------------------------------------------------|------------|
| <b>1. General information.....</b>                                                       | <b>S2</b>  |
| <b>2. General procedure for the synthesis of thiosulfonates and selenosulfonate.....</b> | <b>S2</b>  |
| <b>3. General procedure for the synthesis of products 3 .....</b>                        | <b>S3</b>  |
| <b>4. Confirmation of compound 4.....</b>                                                | <b>S4</b>  |
| <b>5. Mechanism Study.....</b>                                                           | <b>S5</b>  |
| <b>6. Characterization data of compounds 3a-h, 3k-u and 3w-y .....</b>                   | <b>S9</b>  |
| <b>7. NMR and HRMS copies of compounds 3a-h, 3k-u and 3w-y.....</b>                      | <b>S15</b> |

## 1. General information

All reagents and solvents were purchased from commercial suppliers without further purification. All reactions were carried out in borosilicate glass vessels under the irradiation of 5 W blue LED light from a photo reactor manufactured by Beijing Roger Technology Co., Ltd. without using filters. This blue light 5W LED's energy peak wavelength is 452.0 nm, peak width at half-height is 20.5 nm, Irradiance@5W is 117 mW/cm<sup>2</sup>. LED irradiate through a high-reflection channel (path length is 2 cm) to the test tube. The progress of the reactions were monitored by thin-layer chromatography under 254 nm UV light. <sup>1</sup>H NMR and <sup>13</sup>C NMR spectra were recorded at Bruker Avance 400 MHz spectrometer operating at 400 MHz and 100 MHz, respectively. NMR spectra were recorded in CDCl<sub>3</sub> at room temperature (20 ± 2 °C). High-resolution mass spectra (HRMS) of the products were obtained on Agilent Technologies 6530 Accuratemass Q-TOF LC/MS with ESI as ion source. Fluorescence quenching experiments were performed by Hitachi F7000 fluorescence spectrometer.

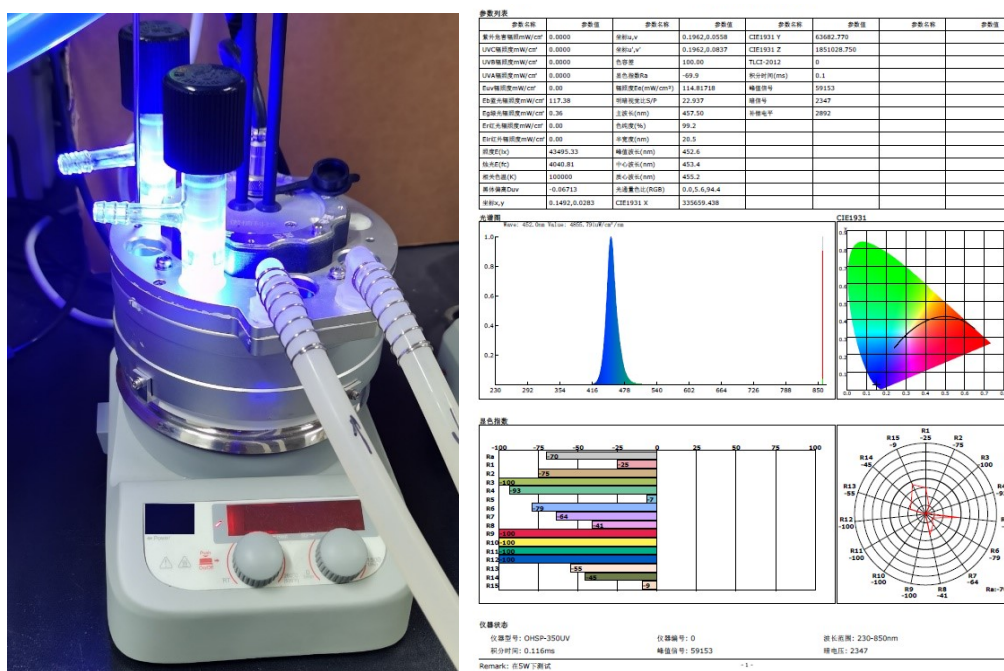

Figure S1 The photo reactor and blue LED light source test.

## 2. General procedure for the synthesis of thiosulfonates and selenosulfonate

**2.1 Synthesis of thiosulfonates.** Thiosulfonates were synthesized according to literature (*Org. Lett.*, 2020, **22**, 4908) with minor modifications. Disulfides (0.5 mmol, 1.0 equiv.), sodium

benzenesulfonates (12 mmol, 2.4 equiv.), iodine (7.5 mmol, 1.5 equiv.) were mixed in CH<sub>2</sub>Cl<sub>2</sub> (20 mL) in a 250 mL round bottom flask. The mixture was stirred at room temperature for 10 h. After completion of the reaction, sodium thiosulfate was added to remove the excess iodine. Then, the mixture was washed by brine (20 mL × 3). The organic phase were combined and dried over anhydrous Na<sub>2</sub>SO<sub>4</sub>. After filtration, the solvent was evaporated and the crude product was purified by silica gel column chromatography (petroleum ether : ethyl acetate = 10 : 1, v/v) to give the desired products.

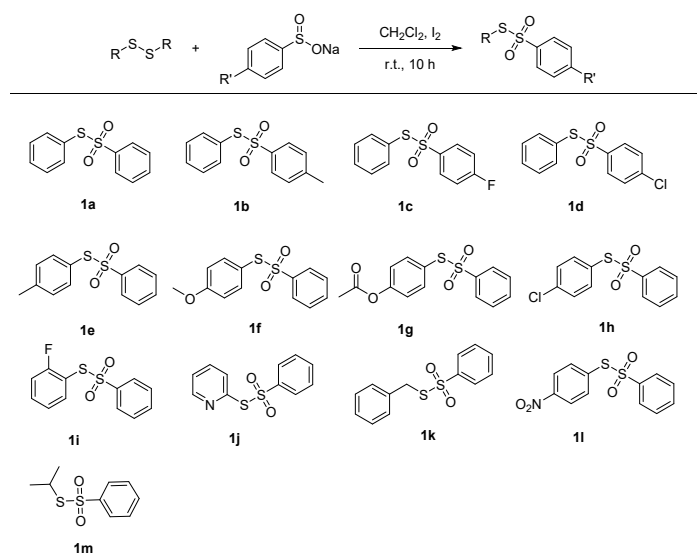

**Scheme S1** Synthesis of thiosulfonates

**2.2 Synthesis of selenosulfonate.** *Se*-phenyl benzenesulfonoselenoate was synthesized according to literature (*J. Org. Chem.*, 2019, **84**, 8100.) by the use of 1,2-diphenyldiselenane and sodium benzenesulfonate with [bis(trifluoroacetoxy)iodo]benzene (PIFA) in dichloromethane at 0 °C to room temperature for 3 h. The desired product was purified by silica gel column chromatography (petroleum ether : ethyl acetate = 10 : 1, v/v).

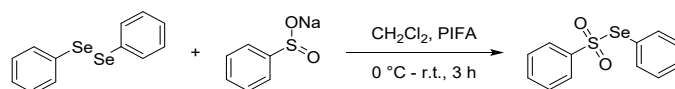

**Scheme S2** Synthesis of selenosulfonate

### 3. General procedure for the synthesis of products 3

Thiosulfonates (0.4 mmol), TBHP (0.4 mmol, 70% aqueous solution), Na<sub>2</sub>-eosin Y (2.5 mol%) and K<sub>2</sub>CO<sub>3</sub> (1.0 equiv.) were dissolved in corresponding *N,N*-disubstituted amides (2.0 mL) in a 25 mL reaction tube, and then the mixture was stirred with the irradiation of 5 W blue LED light under

$N_2$  at room temperature for 12 h. After reaction, the mixture was diluted with brine and extracted with  $CH_2Cl_2$  (15 mL  $\times$  3). The organic layers were combined and dried over anhydrous  $Na_2SO_4$ . The residue was purified by silica gel column chromatography to afford the desired products **3**.

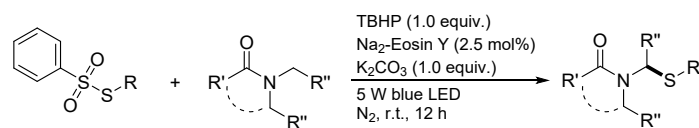

**Scheme S3** Synthesis of products **3**

#### 4. Confirmation of compound **4**

Yellow solid, yield: 70%.  $^1H$  NMR ( $CDCl_3$ , 400 MHz):  $\delta$ : 8.39 (d,  $J = 8.8$  Hz, 2H), 7.88 (d,  $J = 8.8$  Hz, 2H), 1.61 (s, 9H). HRMS (ESI) for  $C_{10}H_{13}NNaO_4S$  ( $M+Na$ ) $^+$ : calcd. 266.0457, found 266.0456.

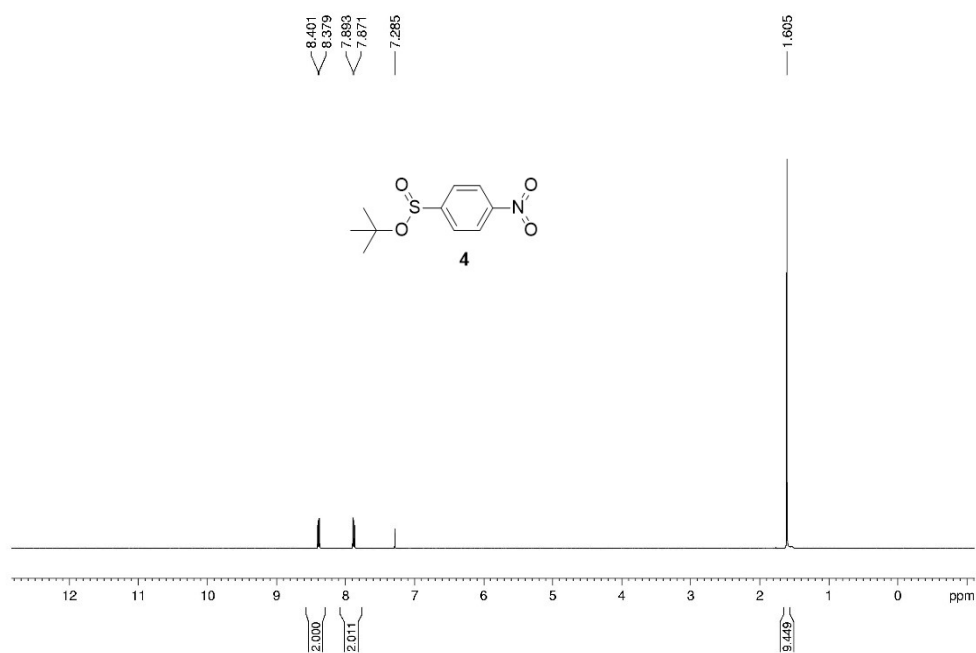

**Figure S2**  $^1H$  NMR of compound **4**

## Spectrum Plot Report

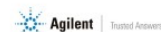

|                |         |              |                      |              |                                   |
|----------------|---------|--------------|----------------------|--------------|-----------------------------------|
| Name           | BWZ-1   | Rack Pos.    | Instrument           | Instrument 1 | Operator                          |
| Inj. Vol. (ul) | 2       | Plate Pos.   | IRM Status           | Success      |                                   |
| Data File      | BWZ-1.d | Method (Acq) | 20211119-4min-2 ul.m | Comment      | Acq. Time (Local)                 |
|                |         |              |                      |              | 11/19/2021 1:27:42 PM (UTC+08:00) |

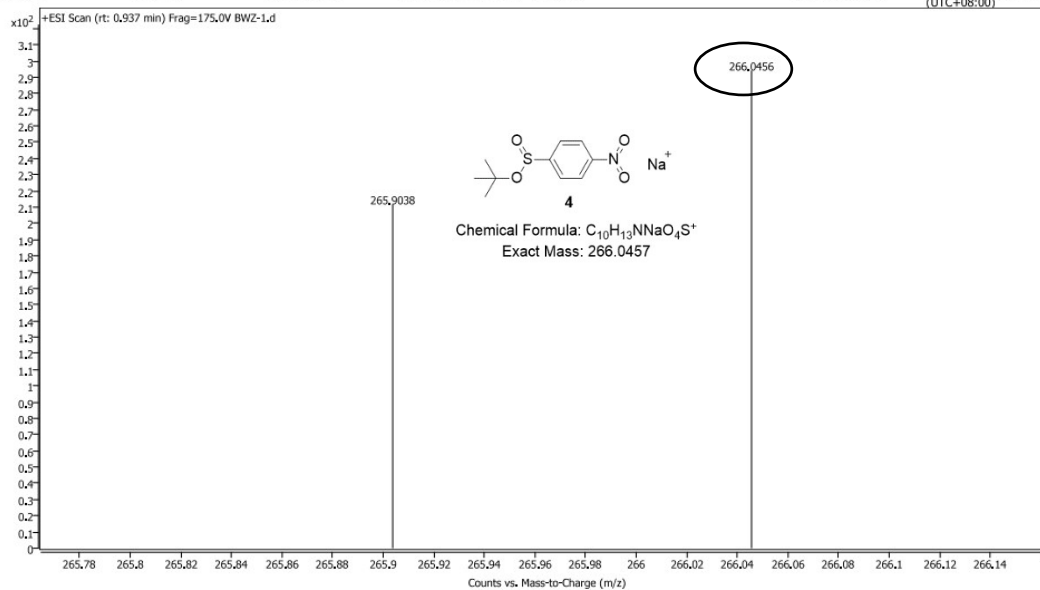

Page 1 of 1

Generated at 7:04 PM on 12/9/2021

Figure S3 HRMS of compound 4

## 5. Mechanism Study

### 5.1 Experiment interfered with radical scavenger

In a 25 mL reaction tube, *S*-phenyl benzenethiosulfonate (**1a**, 0.4 mmol), TBHP (0.4 mmol, 70% aqueous solution), Na<sub>2</sub>-eosin Y (2.5 mol%), K<sub>2</sub>CO<sub>3</sub> (1.0 equiv.) and 2.0 equiv. of (2,2,6,6-tetramethylpiperidin-1-yl)oxidanyl (TEMPO), 1,1-diphenylethylene (ASYM) or 2,6-di-tert-butyl-4-methylphenol (BHT) were dissolved in DMA (2.0 mL), respectively. The mixtures were stirred under standard reaction conditions for 12 h and then detected by HRMS.

### Spectrum Plot Report

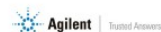

|                |          |              |                      |              |                                                      |
|----------------|----------|--------------|----------------------|--------------|------------------------------------------------------|
| Name           | bwz-11   | Rack Pos.    | Instrument           | Instrument 1 | Operator                                             |
| Inj. Vol. (ul) | 2        | Plate Pos.   | IRM Status           | Success      |                                                      |
| Data File      | BWZ-11.d | Method (Acq) | 20211212-bwz-4 min.m | Comment      | Acq. Time (Local) 12/12/2021 10:47:43 AM (UTC+08:00) |

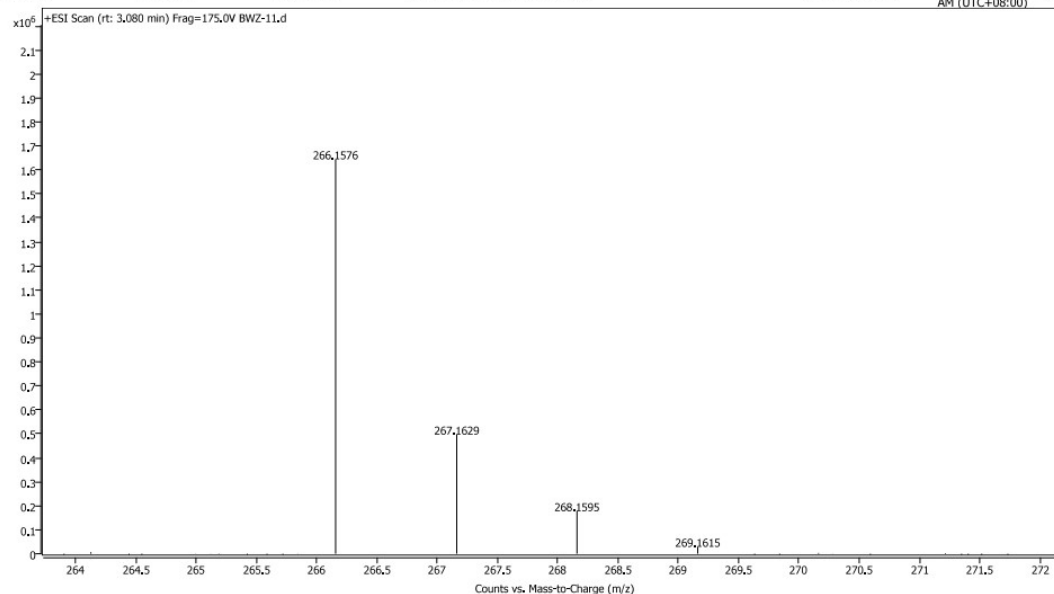

**Figure S4** HRMS spectrum of the benzenesulfonyl radical/TEMPO adduct **6**

### Spectrum Plot Report

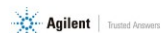

|                |          |              |                      |              |                                                      |
|----------------|----------|--------------|----------------------|--------------|------------------------------------------------------|
| Name           | bwz-11   | Rack Pos.    | Instrument           | Instrument 1 | Operator                                             |
| Inj. Vol. (ul) | 2        | Plate Pos.   | IRM Status           | Success      |                                                      |
| Data File      | BWZ-11.d | Method (Acq) | 20211212-bwz-4 min.m | Comment      | Acq. Time (Local) 12/12/2021 10:47:43 AM (UTC+08:00) |

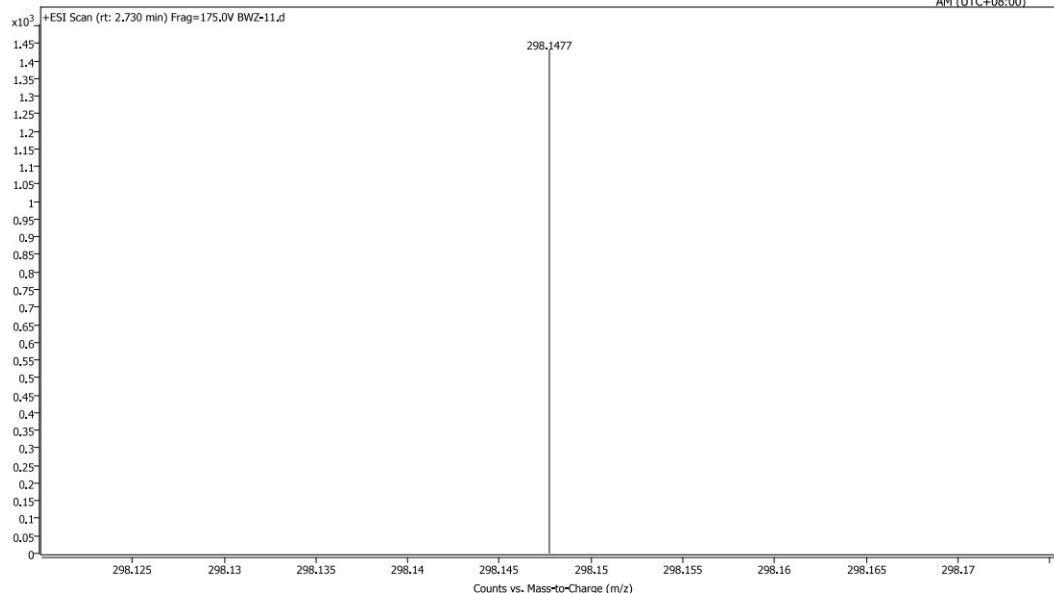

**Figure S5** HRMS spectrum of the benzenesulfonyl radical/TEMPO adduct **7**

### Spectrum Plot Report

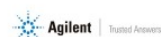

|                |          |              |                      |              |                                                      |
|----------------|----------|--------------|----------------------|--------------|------------------------------------------------------|
| Name           | bwz-12   | Rack Pos.    | Instrument           | Instrument 1 | Operator                                             |
| Inj. Vol. (ul) | 2        | Plate Pos.   | IRM Status           | Success      |                                                      |
| Data File      | BWZ-12.d | Method (Acq) | 20211212-bwz-4 min.m | Comment      | Acq. Time (Local) 12/12/2021 10:52:31 AM (UTC+08:00) |

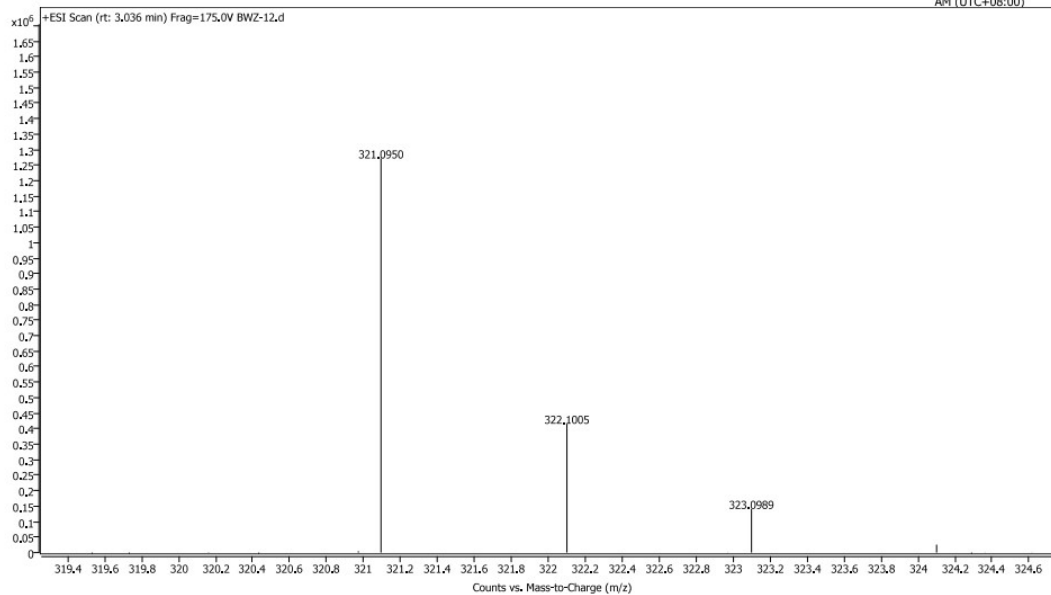

Page 1 of 1

Generated at 8:45 PM on 12/13/2021

**Figure S6** HRMS Spectrum of the benzenesulfonyl radical/ASYM adduct **8**

### Spectrum Plot Report

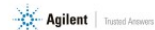

|                |          |              |                      |              |                                                      |
|----------------|----------|--------------|----------------------|--------------|------------------------------------------------------|
| Name           | bwz-10   | Rack Pos.    | Instrument           | Instrument 1 | Operator                                             |
| Inj. Vol. (ul) | 2        | Plate Pos.   | IRM Status           | Success      |                                                      |
| Data File      | BWZ-10.d | Method (Acq) | 20211212-bwz-4 min.m | Comment      | Acq. Time (Local) 12/12/2021 10:42:58 AM (UTC+08:00) |

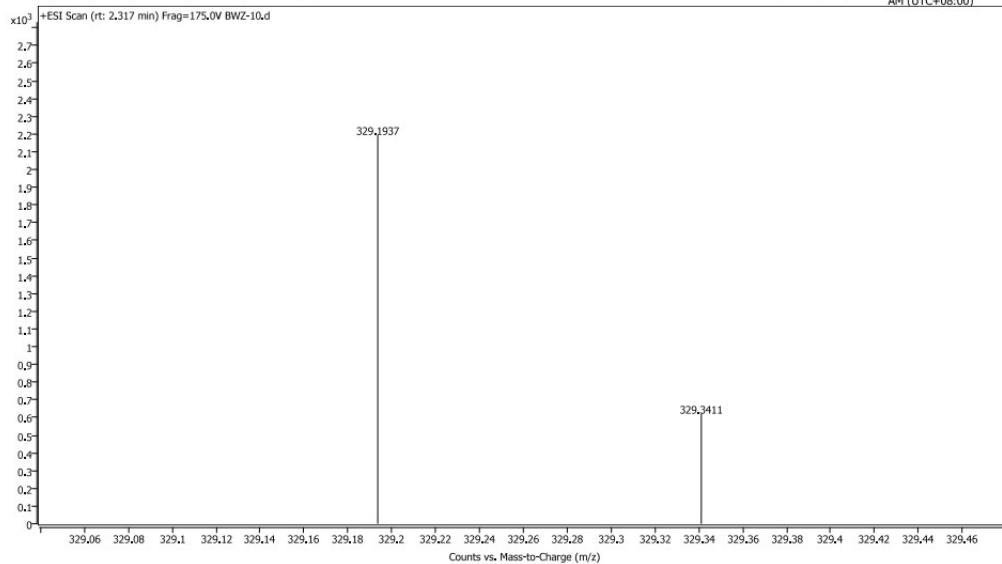

Page 1 of 1

Generated at 8:25 PM on 12/13/2021

**Figure S7** HRMS spectrum of the benzenesulfonyl radical/BHT adduct **9**

## 5.2 Fluorescence quenching experiments

A stock solution of Na<sub>2</sub>-eosin Y (0.1 mM in dry DMA) was prepared for the quenching experiment. 20 μL Na<sub>2</sub>-eosin Y stock solution was added in 2.0 mL of DMA in a quartz cuvette (1 cm × 1 cm). The fluorescence excitation and emission spectra were firstly recorded as shown below. The maximum excitation/emission wavelength were detected as 530/549 nm. Then, quenching experiments were performed with addition of TBHP (70% aqueous solution) or **1a** (0, 1, 2, 3, 4, 5 mM), respectively.

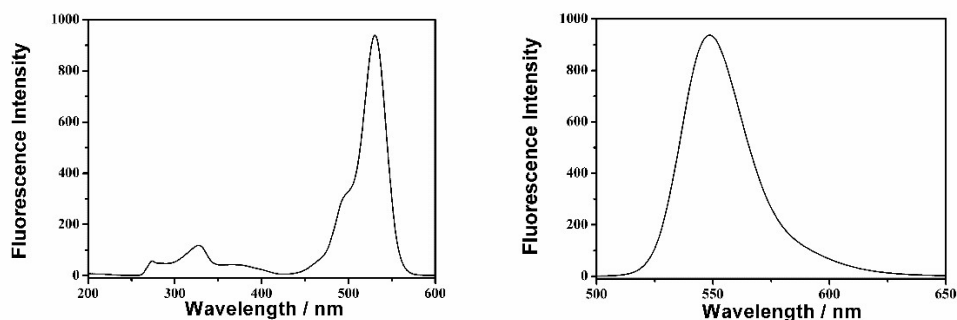

**Figure S8** Fluorescence excitation (left) and emission (right) spectra of Na<sub>2</sub>-eosin Y (10<sup>-6</sup> M) in DMA

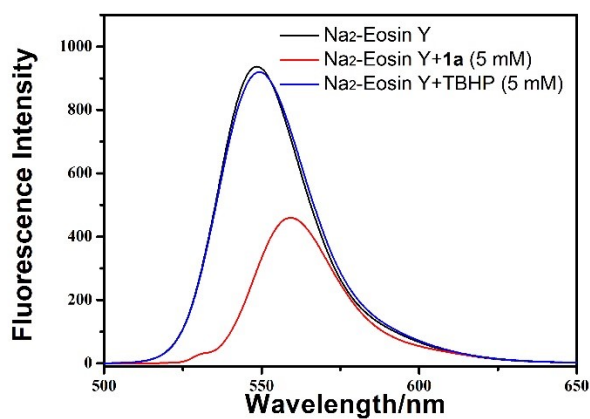

**Figure S9** Fluorescence emission spectra of Na<sub>2</sub>-eosin Y (10<sup>-6</sup> M) in DMA with TBHP or **1a** (5 mM)



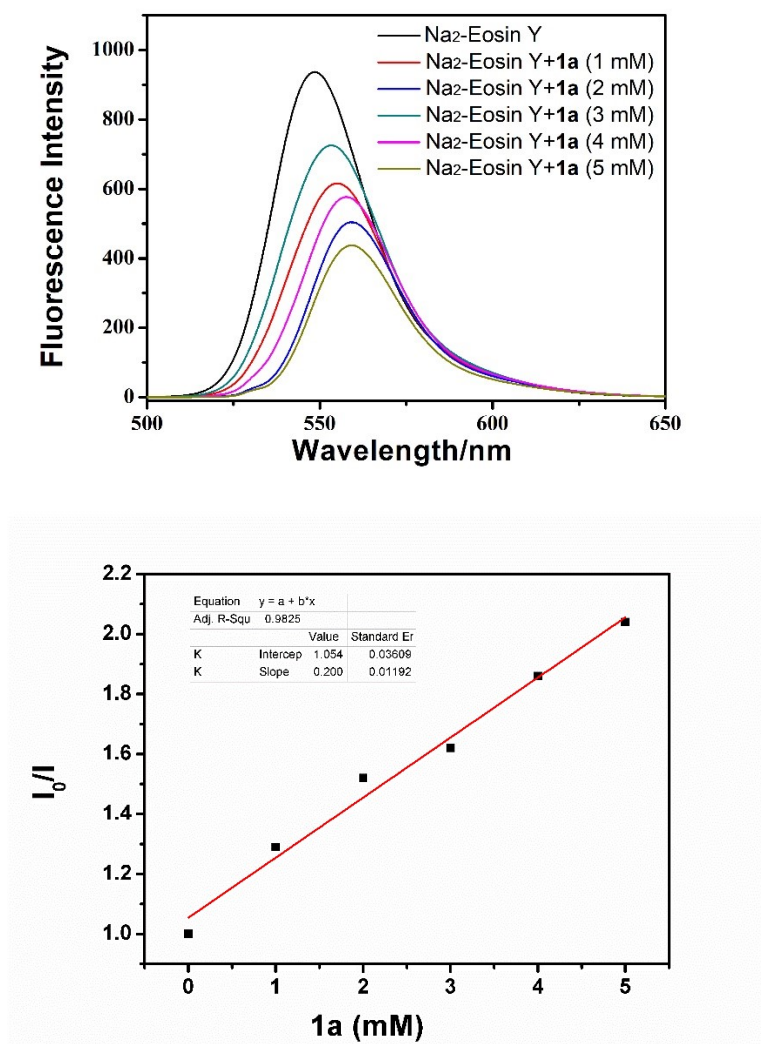

**Figure S10** Fluorescence emission spectra of Na<sub>2</sub>-eosin Y (10<sup>-6</sup> M) in DMA with TBHP and **1a** (up) and the linear relationship between I<sub>0</sub>/I and the concentration of **1a** (down)

## 6. Characterization data of compounds **3a-h**, **3k-u** and **3w-y**.

### *N*-methyl-*N*-((phenylthio)methyl)acetamide (**3a**)

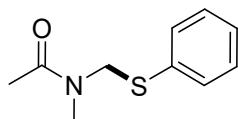

Light-yellow oil, yield: 87%. <sup>1</sup>H NMR (CDCl<sub>3</sub>, 400 MHz): δ: 7.52-7.47 (m, 2H), 7.38-7.25 (m, 3H), 4.91 and 4.67 (2×s, 2H), 3.01 and 2.99 (2×s, 3H), 2.04 and 1.67 (2×s, 3H); <sup>13</sup>C NMR (CDCl<sub>3</sub>, 100 MHz) δ: 170.7 and 170.6, 135.0 and 134.0, 132.4 and 131.5, 129.1 and 129.0, 127.2, 57.8 and 51.7, 35.2 and 32.8, 21.8 and 20.7. HRMS (ESI) for C<sub>10</sub>H<sub>14</sub>NOS (M+H)<sup>+</sup>: calcd. 196.0791, found 196.0799.

### *N*-methyl-*N*-((p-tolylthio)methyl)acetamide (**3b**)

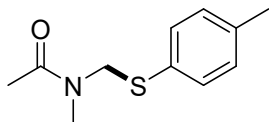

Light-yellow oil, yield: 85%.  $^1\text{H NMR}$  ( $\text{CDCl}_3$ , 400 MHz):  $\delta$ : 7.38-7.35 (m, 2H), 7.15-7.09 (m, 2H), 4.84 and 4.60 (2 $\times$ s, 2H), 2.98 and 2.97 (2 $\times$ s, 3H), 2.34 and 2.32 (2 $\times$ s, 3H), 2.01 and 1.63 (2 $\times$ s, 3H);  $^{13}\text{C NMR}$  ( $\text{CDCl}_3$ , 100 MHz)  $\delta$ : 170.6, 139.3 and 137.5, 135.2 and 132.2, 130.3 and 130.2, 129.8 and 128.7, 58.0 and 52.3, 35.2 and 32.8, 21.8 and 21.2, 21.0 and 20.7. HRMS (ESI) for  $\text{C}_{11}\text{H}_{16}\text{NOS}(\text{M}+\text{H})^+$ : calcd. 210.0947, found 210.0943.

#### ***N*-(((4-methoxyphenyl)thio)methyl)-*N*-methylacetamide (3c)**

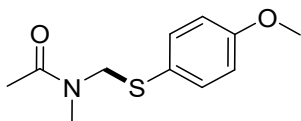

Light-yellow oil, yield: 81%.  $^1\text{H NMR}$  ( $\text{CDCl}_3$ , 400 MHz):  $\delta$ : 7.43-7.40 (m, 2H), 6.87-6.82 (m, 2H), 4.77 and 4.56 (2 $\times$ s, 2H), 3.80 and 3.79 (2 $\times$ s, 3H), 2.982 and 2.975 (2 $\times$ s, 3H), 2.00 and 1.61 (2 $\times$ s, 3H);  $^{13}\text{C NMR}$  ( $\text{CDCl}_3$ , 100 MHz)  $\delta$ : 170.59 and 170.55, 160.6 and 159.6, 137.1 and 134.9, 130.9 and 128.8, 124.2 and 122.7, 114.9 and 114.6, 58.2 and 55.4, 55.3 and 53.2, 35.3 and 32.7, 21.8 and 20.6. HRMS (ESI) for  $\text{C}_{11}\text{H}_{15}\text{NNaO}_2\text{S}(\text{M}+\text{Na})^+$ : calcd. 248.0716, found 248.0723.

#### **4-(((*N*-methylacetamido)methyl)thio)phenyl acetate (3d)**

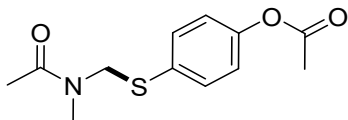

Light-yellow oil, yield: 71%.  $^1\text{H NMR}$  ( $\text{CDCl}_3$ , 400 MHz):  $\delta$ : 7.51-7.46 (m, 2H), 7.10-7.02 (m, 2H), 4.88 and 4.64 (2 $\times$ s, 2H), 3.00 and 2.98 (2 $\times$ s, 3H), 2.30 and 2.29 (2 $\times$ s, 3H), 2.03 and 1.69 (2 $\times$ s, 3H);  $^{13}\text{C NMR}$  ( $\text{CDCl}_3$ , 100 MHz)  $\delta$ : 170.8, 169.2 and 169.0, 151.4 and 150.0, 136.2 and 132.7, 131.2 and 130.9, 129.6 and 128.8, 122.7 and 122.2, 58.0 and 51.9, 35.2 and 32.9, 21.8 and 21.1, 20.7 and 19.2. HRMS (ESI) for  $\text{C}_{12}\text{H}_{16}\text{NO}_3\text{S}(\text{M}+\text{H})^+$ : calcd. 254.0845, found 254.0842.

#### ***N*-(((4-chlorophenyl)thio)methyl)-*N*-methylacetamide (3e)**

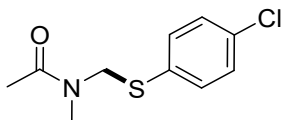

Light-yellow oil, yield: 62%.  $^1\text{H NMR}$  ( $\text{CDCl}_3$ , 400 MHz):  $\delta$ : 7.43-7.38 (m, 2H), 7.33-7.25 (m, 2H), 4.88 and 4.64 (2 $\times$ s, 2H), 3.01 and 2.97 (2 $\times$ s, 3H), 2.03 and 1.72 (2 $\times$ s, 3H);  $^{13}\text{C NMR}$  ( $\text{CDCl}_3$ , 100 MHz)  $\delta$ : 170.8 and 170.5, 136.2 and 135.5, 133.4 and 132.8, 132.4 and 130.9, 129.6 and 129.1, 57.8 and 51.7, 35.1 and 33.0, 21.8 and 20.8. HRMS (ESI) for  $\text{C}_{10}\text{H}_{13}\text{ClNOS}(\text{M}+\text{H})^+$ : calcd. 230.0401, found 230.0400.

#### ***N*-(((2-fluorophenyl)thio)methyl)-*N*-methylacetamide (3f)**

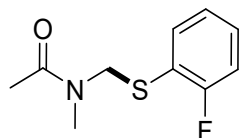

Light-yellow oil, yield: 53%.  $^1\text{H}$  NMR ( $\text{CDCl}_3$ , 400 MHz):  $\delta$ : 7.55-7.27 (m, 2H), 7.26-7.04 (m, 2H), 4.85 and 4.69 (2 $\times$ s, 2H), 3.02 and 2.97 (2 $\times$ s, 3H), 2.01 and 1.80 (2 $\times$ s, 3H);  $^{13}\text{C}$  NMR ( $\text{CDCl}_3$ , 100 MHz)  $\delta$ : 170.8 and 170.5, 164.4 and 163.6, 161.9 and 161.2, 137.3 and 135.1, 131.6 and 131.5, 130.1 and 130.0, 125.0 and 124.9, 124.6 and 124.5, 120.8 and 120.6, 119.2 and 119.0, 116.3 and 116.0, 115.9 and 115.6, 56.4 and 51.6, 35.2 and 33.0, 21.8 and 20.6. HRMS (ESI) for  $\text{C}_{10}\text{H}_{12}\text{FNOS}(\text{M}+\text{K})^+$ : calcd. 252.0255, found 252.0256.

### ***N*-methyl-*N*-((pyridin-2-ylthio)methyl)acetamide (3g)**

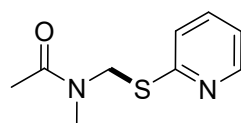

Light-yellow oil, yield: 77%.  $^1\text{H}$  NMR ( $\text{CDCl}_3$ , 400 MHz):  $\delta$ : 8.45-8.42 (m, 1H), 7.63-7.48 (m, 1H), 7.25-7.20 (m, 1H), 7.07-7.00 (m, 1H), 5.29 and 5.26 (2 $\times$ s, 2H), 3.10 and 2.97 (2 $\times$ s, 3H), 2.24 and 2.09 (2 $\times$ s, 3H);  $^{13}\text{C}$  NMR ( $\text{CDCl}_3$ , 100 MHz)  $\delta$ : 171.4 and 171.0, 157.8 and 156.3, 149.4 and 149.2, 136.5 and 136.3, 123.4 and 122.7, 120.5 and 120.0, 51.5 and 47.2, 35.8 and 33.1, 21.8 and 21.6. HRMS (ESI) for  $\text{C}_9\text{H}_{12}\text{N}_2\text{NaOS}(\text{M}+\text{Na})^+$ : calcd. 219.0563, found 219.0572.

### ***N*-((benzylthio)methyl)-*N*-methylacetamide (3h)**

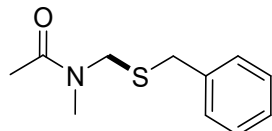

Light-yellow oil, yield: 80%.  $^1\text{H}$  NMR ( $\text{CDCl}_3$ , 400 MHz):  $\delta$ : 7.38-7.28 (m, 4H), 7.24-7.22 (m, 1H), 4.58 and 4.34 (2 $\times$ s, 2H), 3.78 and 3.77 (2 $\times$ s, 2H), 2.93 and 2.91 (2 $\times$ s, 3H), 1.99 and 1.98 (2 $\times$ s, 3H);  $^{13}\text{C}$  NMR ( $\text{CDCl}_3$ , 100 MHz)  $\delta$ : 171.1 and 170.6, 138.8 and 137.2, 128.80 and 128.76, 128.7 and 128.4, 127.5 and 126.9, 52.3 and 49.2, 35.8 and 35.1, 34.7 and 33.0, 21.9 and 21.2. HRMS (ESI) for  $\text{C}_{11}\text{H}_{15}\text{NNaOS}(\text{M}+\text{Na})^+$ : calcd. 232.0767, found 232.0767.

### ***N*-methyl-*N*-((phenylthio)methyl)propionamide (3k)**

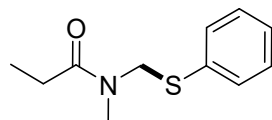

Light-yellow oil, yield: 75%.  $^1\text{H}$  NMR ( $\text{CDCl}_3$ , 400 MHz):  $\delta$ : 7.49-7.46 (m, 2H), 7.34-7.23 (m, 3H), 4.91 and 4.67 (2 $\times$ s, 2H), 2.98 (2 $\times$ s, 3H), 2.26 and 1.91 (2 $\times$ q, 2H), 1.05 and 0.92 (2 $\times$ t, 3H);  $^{13}\text{C}$  NMR ( $\text{CDCl}_3$ , 100 MHz)  $\delta$ : 173.9 and 173.9, 134.8 and 134.0, 132.6 and 131.6, 129.3 and 129.0, 128.8 and 127.2, 56.8 and 52.0, 34.3 and 33.2, 26.9 and 25.7, 9.2 and 9.1. HRMS (ESI) for  $\text{C}_{11}\text{H}_{16}\text{NOS}(\text{M}+\text{H})^+$ : calcd. 210.0947, found 210.0944.

***N*-methyl-*N*-((*p*-tolylthio)methyl)propionamide (3l)**

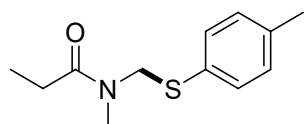

Light-yellow oil, yield: 83%. <sup>1</sup>H NMR (CDCl<sub>3</sub>, 400 MHz): δ: 7.37-7.35 (m, 2H), 7.14-7.08 (m, 2H), 4.85 and 4.62 (2×s, 2H), 2.97 (2×s, 3H), 2.34 and 2.31 (2×s, 3H), 2.25 and 1.89 (2×q, 2H), 1.05 and 0.91 (2×t, 3H); <sup>13</sup>C NMR (CDCl<sub>3</sub>, 100 MHz) δ: 173.9 and 173.8, 139.1 and 137.4, 135.0 and 132.3, 130.3 and 130.1, 129.7 and 128.9, 56.9 and 52.6, 34.4 and 33.1, 26.8 and 25.6, 21.2 and 21.1, 9.13 and 9.06. HRMS (ESI) for C<sub>12</sub>H<sub>18</sub>NOS(M+H)<sup>+</sup>: calcd. 224.1104, found 224.1103.

***N*-(((4-methoxyphenyl)thio)methyl)-*N*-methylpropionamide (3m)**

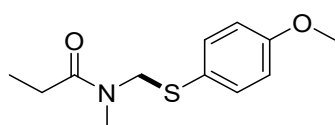

Light-yellow oil, yield: 81%. <sup>1</sup>H NMR (CDCl<sub>3</sub>, 400 MHz): δ: 7.43-7.39 (m, 2H), 6.88-6.82 (m, 2H), 4.79 and 4.57 (2×s, 2H), 3.80 and 3.79 (2×s, 3H), 2.97 and 2.96 (2×s, 3H), 2.24 and 1.86 (2×q, 2H), 1.04 and 0.90 (2×t, 3H); <sup>13</sup>C NMR (CDCl<sub>3</sub>, 100 MHz) δ: 173.9 and 173.8, 160.5 and 159.6, 138.4 and 137.0, 135.0 and 129.9, 124.2 and 122.8, 114.9 and 114.5, 113.8, 57.2 and 55.4, 55.3 and 53.4, 34.5 and 33.1, 26.8 and 25.6, 9.2 and 9.1. HRMS (ESI) for C<sub>12</sub>H<sub>18</sub>NO<sub>2</sub>S (M+H)<sup>+</sup>: calcd. 240.1053, found 240.1059.

***N*-(((4-chlorophenyl)thio)methyl)-*N*-methylpropionamide (3n)**

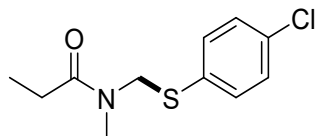

Light-yellow oil, yield: 85%. <sup>1</sup>H NMR (CDCl<sub>3</sub>, 400 MHz): δ: 7.42-7.38 (m, 2H), 7.32-7.24 (m, 2H), 4.89 and 4.66 (2×s, 2H), 2.99 and 2.97 (2×s, 3H), 2.27 and 1.97 (2×q, 2H), 1.06 and 0.96 (2×t, 3H); <sup>13</sup>C NMR (CDCl<sub>3</sub>, 100 MHz) δ: 174.0 and 173.8, 135.9 and 135.3, 133.3 and 132.9, 132.4 and 131.1, 129.5 and 129.1, 56.8 and 51.9, 34.3 and 33.3, 26.9 and 25.8, 9.15 and 9.07. HRMS (ESI) for C<sub>11</sub>H<sub>15</sub>ClNOS(M+H)<sup>+</sup>: calcd. 244.0557, found 244.0563.

***N*-(((2-fluorophenyl)thio)methyl)-*N*-methylpropionamide (3o)**

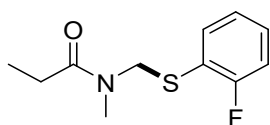

Light-yellow oil, yield: 78%. <sup>1</sup>H NMR (CDCl<sub>3</sub>, 400 MHz): δ: 7.55-7.28 (m, 2H), 7.25-7.04 (m, 2H), 4.87 and 4.71 (2×s, 2H), 3.01 and 2.97 (2×s, 3H), 2.25 and 2.08 (2×q, 2H), 1.03 and 0.97 (2×t, 3H); <sup>13</sup>C NMR (CDCl<sub>3</sub>, 100 MHz) δ: 174.0 and 173.8, 164.2 and 163.6, 161.8 and 161.2, 137.1 and 135.2, 131.4 and 131.3, 130.03 and 129.95, 124.9 and 124.8, 124.53 and 124.49, 120.8 and 120.6, 119.4 and 119.2, 116.2 and 116.0, 115.9 and 115.6, 55.41 and 55.39, 51.86 and 51.84, 34.4 and

33.3, 26.8 and 25.6, 9.2 and 9.0. HRMS (ESI) for  $C_{11}H_{15}FNOS(M+H)^+$ : calcd. 228.0853, found 228.0851.

***N*-methyl-*N*-((pyridin-2-ylthio)methyl)propionamide (3p)**

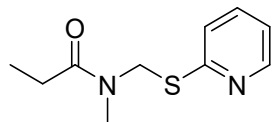

Light-yellow oil, yield: 77%.  $^1H$  NMR ( $CDCl_3$ , 400 MHz):  $\delta$ : 8.44-8.41 (m, 1H), 7.52-7.47 (m, 1H), 7.25-7.19 (m, 1H), 7.06-6.99 (m, 1H), 5.30 and 5.27 (2 $\times$ s, 2H), 3.08 and 2.97 (2 $\times$ s, 3H), 2.52 and 2.33 (2 $\times$ q, 2H), 1.16 and 1.13 (2 $\times$ t, 3H);  $^{13}C$  NMR ( $CDCl_3$ , 100 MHz)  $\delta$ : 174.5 and 174.2, 158.0 and 156.6, 149.4 and 149.2, 136.5 and 136.3, 123.4 and 122.7, 120.4 and 119.9, 50.6 and 47.5, 35.0 and 33.4, 26.8 and 26.4, 9.4 and 9.0. HRMS (ESI) for  $C_{10}H_{15}N_2OS(M+H)^+$ : calcd. 211.0900, found 211.0904.

***N*-((benzylthio)methyl)-*N*-methylpropionamide (3q)**

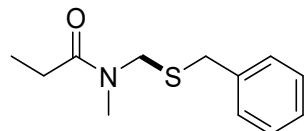

Light-yellow oil, yield: 81%.  $^1H$  NMR ( $CDCl_3$ , 400 MHz):  $\delta$ : 7.38-7.22 (m, 5H), 4.60 and 4.35 (2 $\times$ s, 2H), 3.78 and 3.76 (2 $\times$ s, 2H), 2.94 and 2.90 (2 $\times$ s, 3H), 2.20 (2 $\times$ q, 2H), 1.10 (2 $\times$ t, 3H);  $^{13}C$  NMR ( $CDCl_3$ , 100 MHz)  $\delta$ : 174.3 and 173.8, 138.9 and 137.3, 128.8 and 128.7, 128.6 and 128.4, 127.4 and 126.9, 51.4 and 49.5, 35.8 and 35.2, 33.9 and 33.3, 26.9 and 26.1, 9.3 and 9.1. HRMS (ESI) for  $C_{12}H_{18}NOS(M+H)^+$ : calcd. 224.1104, found 224.1114.

***N*-ethyl-*N*-(1-(phenylthio)ethyl)acetamide (3r)**

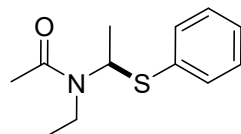

Light-yellow oil, yield: 63%.  $^1H$  NMR ( $CDCl_3$ , 400 MHz):  $\delta$ : 7.45-7.43 (m, 1H), 7.38-7.32 (m, 3H), 7.24-7.23 (m, 1H), 6.47 and 5.23 (2 $\times$ q, 1H), 3.71-3.57 and 3.33-3.20 (2 $\times$ q, 2H), 1.94 and 1.51 (2 $\times$ s, 3H), 1.59 and 1.48 (2 $\times$ d, 3H), 1.20 (2 $\times$ t, 3H);  $^{13}C$  NMR ( $CDCl_3$ , 100 MHz)  $\delta$ : 170.8 and 169.8, 135.5 and 133.7, 132.5 and 131.7, 129.3 and 129.2, 128.8 and 127.2, 64.9 and 57.0, 37.8 and 36.3, 21.6 and 21.2, 21.1 and 20.1, 16.3 and 14.7. HRMS (ESI) for  $C_{12}H_{18}NOS(M+H)^+$ : calcd. 224.1104, found 224.1100.

***N*-ethyl-*N*-(1-(*p*-tolylthio)ethyl)acetamide (3s)**

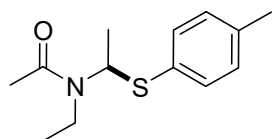

Light-yellow oil, yield: 61%.  $^1H$  NMR ( $CDCl_3$ , 400 MHz):  $\delta$ : 7.32-7.28 (m, 2H), 7.13-7.06 (m, 2H),

6.40 and 5.19 (2×q, 1H), 3.71-3.58 and 3.38-3.20 (2×q, 2H), 2.34 and 2.30 (2×s, 3H), 1.93 and 1.51 (2×s, 3H), 1.58 and 1.46 (2×d, 3H), 1.20 (2×t, 3H); <sup>13</sup>C NMR (CDCl<sub>3</sub>, 100 MHz) δ: 170.7 and 169.9, 139.4 and 137.5, 135.6 and 132.4, 130.0 and 129.9, 129.6 and 128.9, 64.9 and 57.4, 37.7 and 36.2, 21.6 and 21.3, 21.2 and 21.1, 21.0 and 20.1, 16.3 and 14.8. HRMS (ESI) for C<sub>13</sub>H<sub>20</sub>NOS(M+H)<sup>+</sup>: calcd. 238.1260, found 238.1264.

***N*-1-((4-chlorophenyl)thio)ethyl)-*N*-ethylacetamide (3t)**

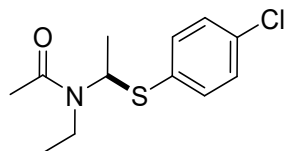

Light-yellow oil, yield: 67%. <sup>1</sup>H NMR (CDCl<sub>3</sub>, 400 MHz): δ: 7.35-7.28 (m, 3H), 7.24-7.22 (m, 1H), 6.46 and 5.22 (2×q, 1H), 3.70-3.54 and 3.37-3.20 (2×q, 2H), 1.97 and 1.58 (2×s, 3H), 1.57 and 1.48 (2×d, 3H), 1.21 (2×t, 3H); <sup>13</sup>C NMR (CDCl<sub>3</sub>, 100 MHz) δ: 170.8 and 169.7, 136.7 and 135.6, 133.3 and 132.9, 132.3 and 131.0, 129.5 and 129.2, 129.0 and 126.4, 64.9 and 57.0, 37.7 and 36.3, 21.6 and 21.4, 21.0 and 20.0, 16.3 and 14.7. HRMS (ESI) for C<sub>12</sub>H<sub>17</sub>ClNOS(M+H)<sup>+</sup>: calcd. 258.0714, found 258.0714.

***N*-1-(benzylthio)ethyl)-*N*-ethylacetamide (3u)**

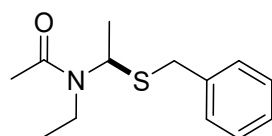

Light-yellow oil, yield: 61%. <sup>1</sup>H NMR (CDCl<sub>3</sub>, 400 MHz): δ: 7.34-7.32 (m, 2H), 7.30-7.29 (m, 3H), 6.21 and 4.91 (2×q, 1H), 3.72 and 3.64 (2×m, 2H), 3.52-3.42 and 3.01-2.92 (2×m, 2H), 1.96 and 1.82 (2×s, 3H), 1.45 and 1.34 (2×d, 3H), 1.20 (2×t, 3H); <sup>13</sup>C NMR (CDCl<sub>3</sub>, 100 MHz) δ: 172.8 and 171.1, 138.6 and 137.3, 134.2 and 133.7, 131.8 and 130.5, 129.6 and 128.8, 128.6 and 128.4, 128.0 and 127.4, 126.8, 58.6 and 55.2, 37.5 and 36.1, 35.8 and 35.1, 21.8, 20.9 and 20.5, 16.7 and 15.0. HRMS (ESI) for C<sub>13</sub>H<sub>20</sub>NOS(M+H)<sup>+</sup>: calcd. 238.1260, found 238.1263.

**1-((phenylthio)methyl)pyrrolidin-2-one (a) and 1-methyl-5-(phenylthio)pyrrolidin-2-one (b) (a : b = 0.17 : 1) (3w)**

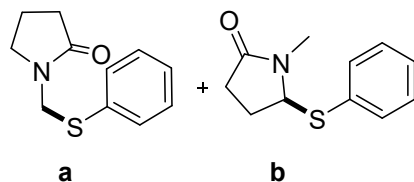

Light-yellow oil, yield: 61%. <sup>1</sup>H NMR (CDCl<sub>3</sub>, 400 MHz): δ: 7.45-7.42 (m, 2H), 7.36-7.34 (m, 3H), 4.81 (m, 1H), 4.77 (s, 2H), 3.44 (t, 2H), 2.99 (s, 3H), 2.52-2.44 (m, 1H), 2.32-2.28 (m, 2H), 2.22-2.16 (m, 1H), 2.13-2.06 (m, 1H), 1.98-1.93 (m, 2H), 1.73-1.64 (m, 1H); <sup>13</sup>C NMR (CDCl<sub>3</sub>, 100 MHz) δ: 174.5 and 174.2, 161.1 and 160.8, 136.0 and 135.2, 131.0 and 130.6, 129.3 and 129.1, 129.0, 127.2, 69.6, 46.8 and 46.0, 29.7 and 29.1, 28.1, 26.6, 17.7. HRMS (ESI) for C<sub>11</sub>H<sub>14</sub>NOS(M+H)<sup>+</sup>: calcd. 208.0791, found 208.0791.

**1-(((4-chlorophenyl)thio)methyl)pyrrolidin-2-one (a) and 5-((4-chlorophenyl)thio)-1-methylpyrrolidin-2-one (b) (a : b = 0.27 : 1) (3x)**

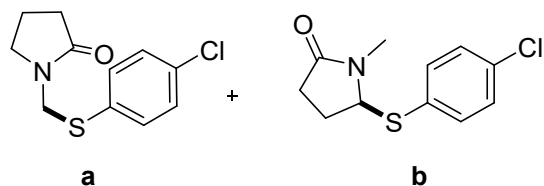

Light-yellow oil, yield: 73%. <sup>1</sup>H NMR (CDCl<sub>3</sub>, 400 MHz): δ: 7.37-7.28 (m, 4H), 4.79 (m, 1H), 4.75 (s, 2H), 3.44 (t, 2H), 2.98 (s, 3H), 2.53-2.47 (m, 1H), 2.33-2.29 (m, 2H), 2.19-2.10 (m, 2H), 1.99-1.96 (m, 2H), 1.80-1.71 (m, 1H); <sup>13</sup>C NMR (CDCl<sub>3</sub>, 100 MHz) δ: 174.4 and 173.7, 156.8 and 156.0, 136.4 and 135.6, 132.2, 129.6, 129.24 and 129.16, 69.7, 46.8 and 45.9, 30.8 and 29.1, 28.1 and 26.4, 17.6. HRMS (ESI) for C<sub>11</sub>H<sub>13</sub>ClNOS(M+H)<sup>+</sup>: calcd. 242.0401, found 242.0402.

**N-methyl-N-((phenylthio)methyl)benzamide (3y)**

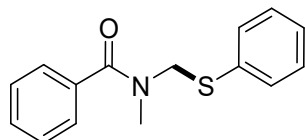

Light-yellow oil, yield: 30%. <sup>1</sup>H NMR (CDCl<sub>3</sub>, 400 MHz): δ: 7.54 (2×s, 1H), 7.30 (2×s, 8H), 7.97 (2×s, 1H), 5.06 and 4.69 (2×s, 2H), 3.18 and 2.96 (2×s, 3H); <sup>13</sup>C NMR (CDCl<sub>3</sub>, 100 MHz) δ: 171.8 and 171.7, 134.4, 133.5, 132.3, 132.0 and 129.7, 129.5 and 129.3, 129.1 and 128.6, 128.3, 127.5, 126.9, 58.3 and 51.6, 32.6 and 29.7. HRMS (ESI) for C<sub>15</sub>H<sub>15</sub>NNaOS (M+Na)<sup>+</sup>: calcd. 280.0767, found 280.0778.

**7. <sup>1</sup>H NMR, <sup>13</sup>C NMR and HRMS copies of compounds 3a-h, 3k-u and 3w-y.**

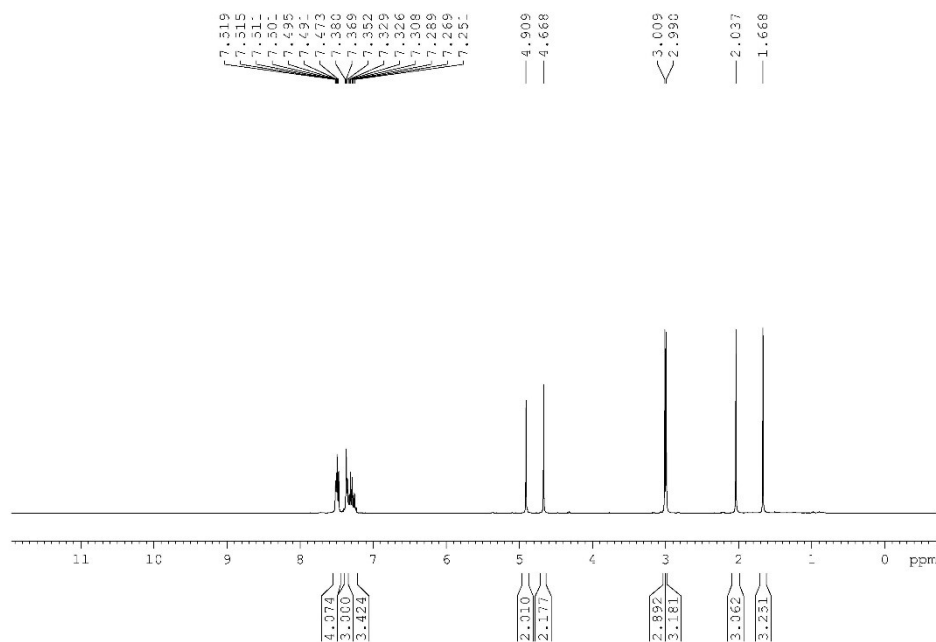

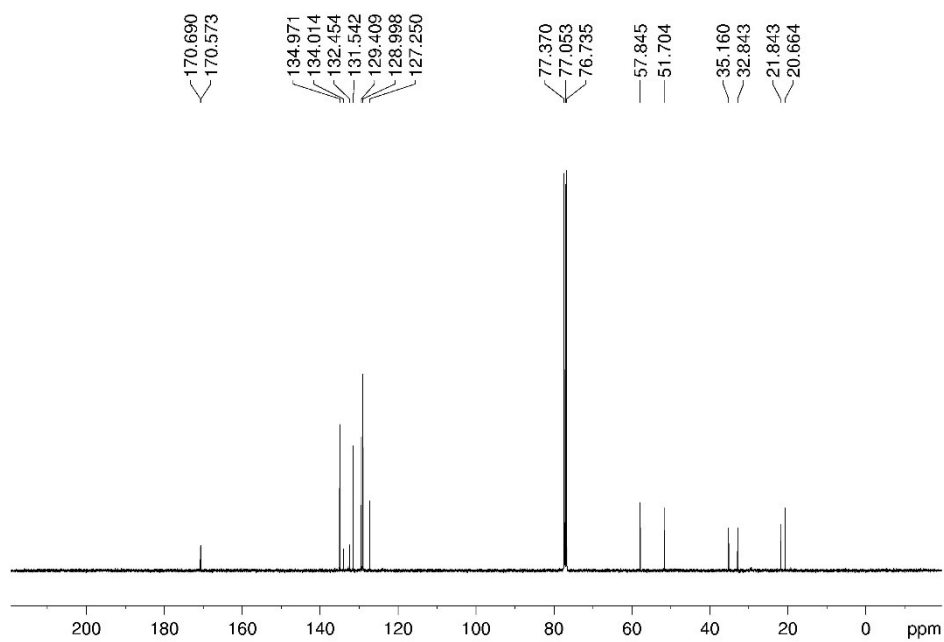

<sup>13</sup>C NMR spectrum of compound **3a**

Spectrum Plot Report

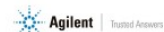

|                |             |              |               |            |              |                                   |
|----------------|-------------|--------------|---------------|------------|--------------|-----------------------------------|
| Name           | yueyaxing   | Rack Pos.    |               | Instrument | Instrument 1 | Operator                          |
| Inj. Vol. (ul) | 4           | Plate Pos.   |               | IRM Status | Success      |                                   |
| Data File      | yueyaxing.d | Method (Acq) | 20211021-GY,m | Comment    |              | Acq. Time (Local)                 |
|                |             |              |               |            |              | 10/27/2021 7:36:44 AM (UTC+08:00) |

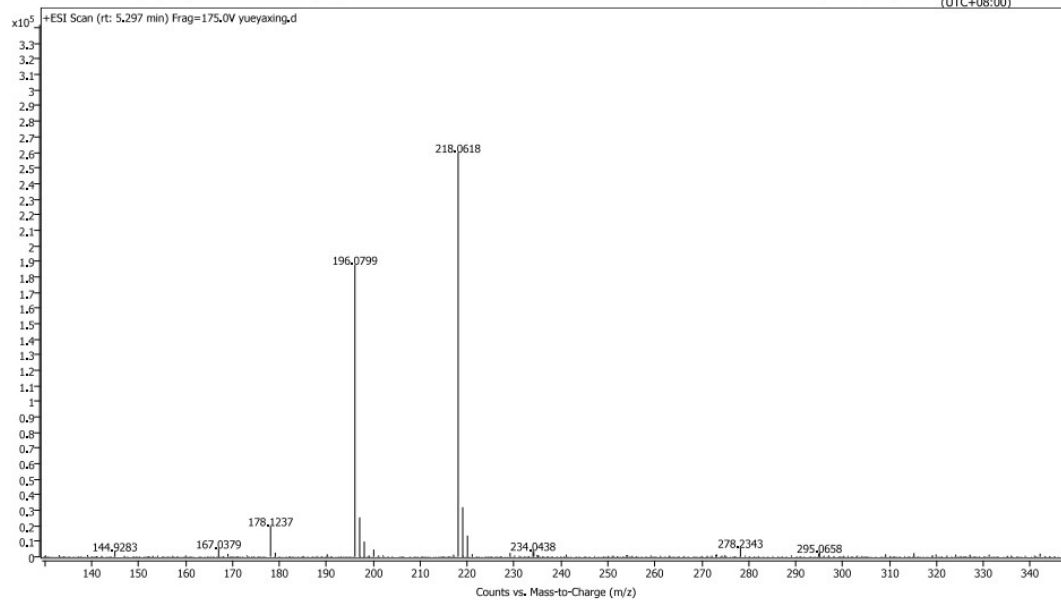

HRMS spectrum of compound **3a**



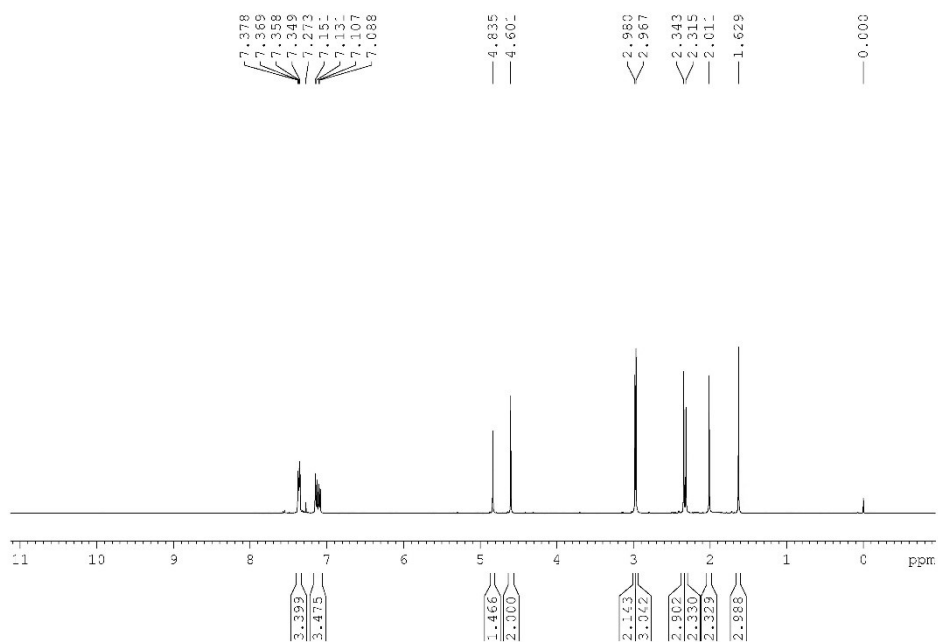

$^1\text{H}$  NMR spectrum of compound **3b**

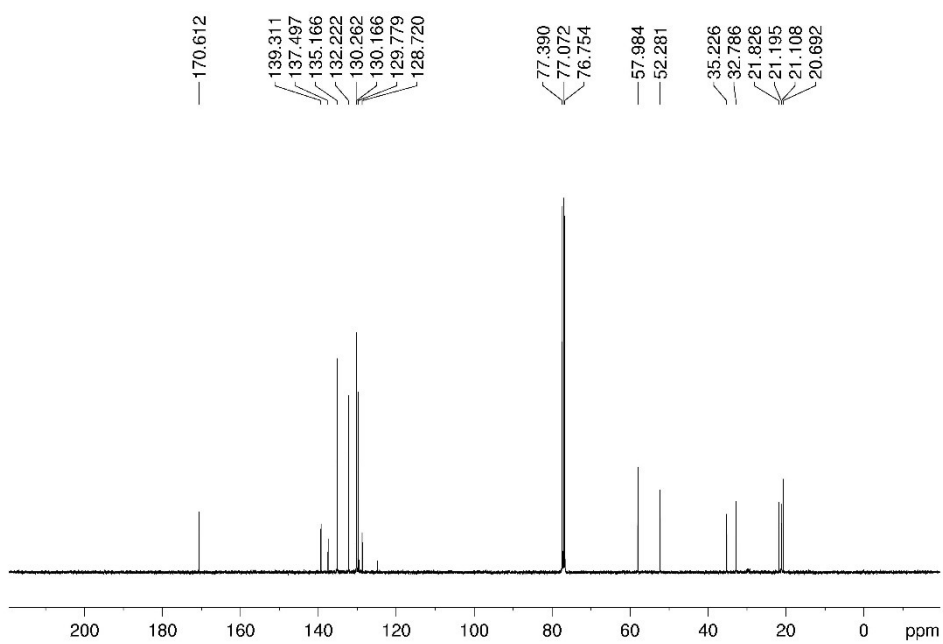

$^{13}\text{C}$  NMR spectrum of compound **3b**

# Spectrum Plot Report

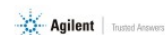

|                |         |              |                       |              |                                   |
|----------------|---------|--------------|-----------------------|--------------|-----------------------------------|
| Name           | BWZ-8   | Rack Pos.    | Instrument            | Instrument 1 | Operator                          |
| Inj. Vol. (ul) | 2       | Plate Pos.   | IRM Status            | Success      |                                   |
| Data File      | BWZ-8.d | Method (Acq) | 20211119-4min -2 ul.m | Comment      | Acq. Time (Local)                 |
|                |         |              |                       |              | 11/19/2021 2:01:41 PM (UTC+08:00) |

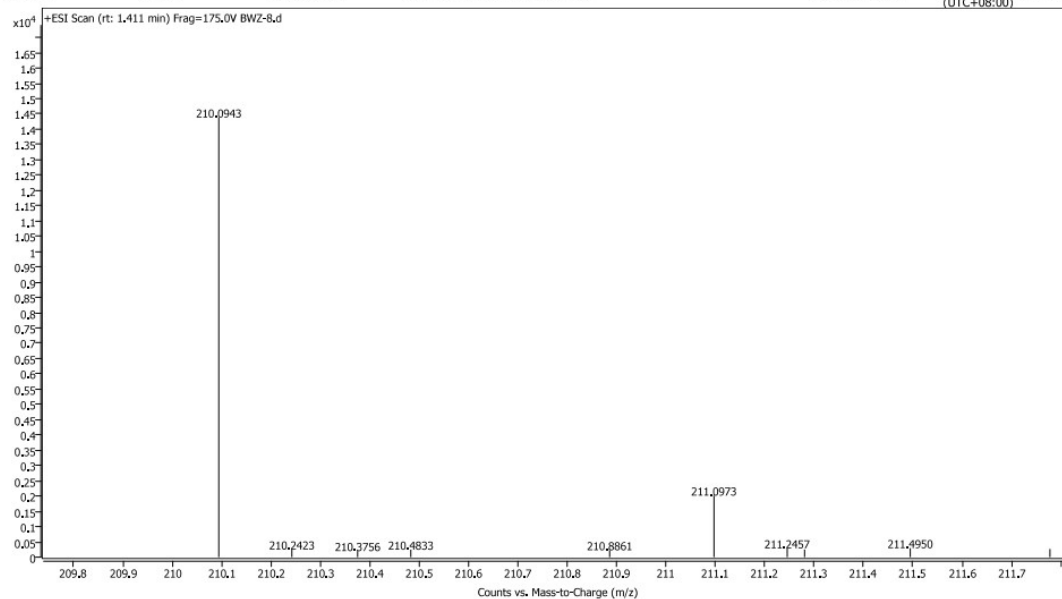

Page 1 of 1

Generated at 9:41 AM on 11/20/2021

## HRMS spectrum of compound 3b

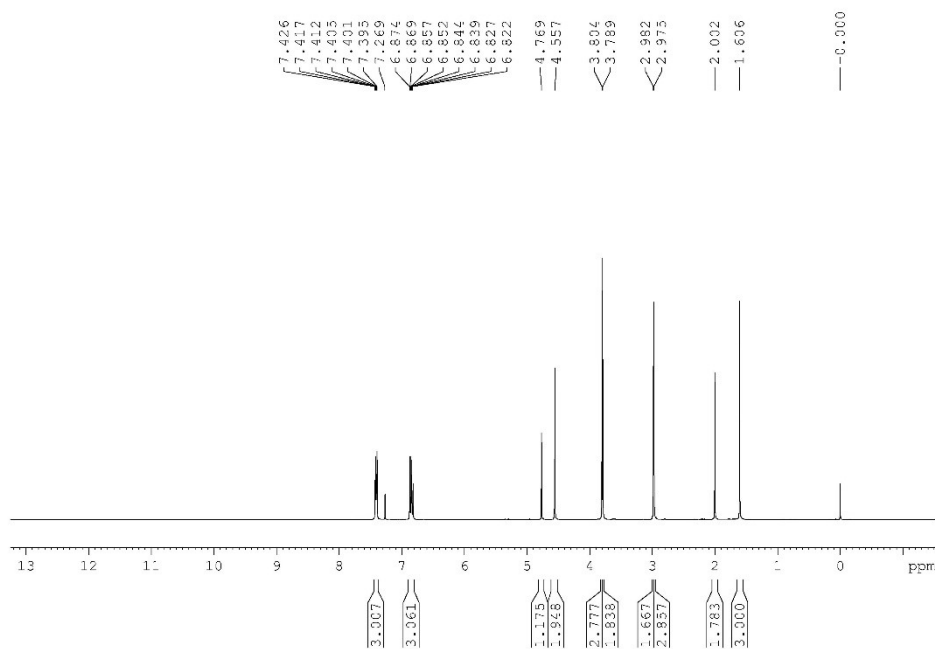

## <sup>1</sup>H NMR spectrum of compound 3c

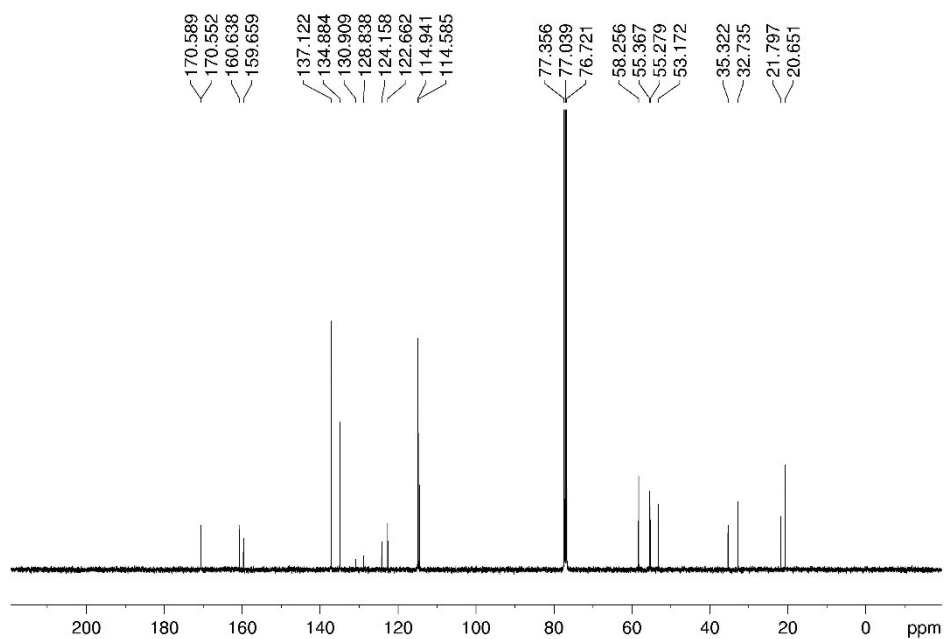

$^{13}\text{C}$  NMR spectrum of compound **3c**

### Spectrum Plot Report

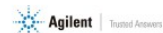

| Name      | Inj. Vol. (ul) | Rack Pos.    | Instrument          | Instrument 1 | Operator                          |
|-----------|----------------|--------------|---------------------|--------------|-----------------------------------|
| BWZ-4-1   | 2              | 2            | 202111120-METHOD-I- | Success      |                                   |
| Data File | BWZ-4-1.d      | Method (Acq) | 4MIN.m              | Comment      | Acq. Time (Local)                 |
|           |                |              |                     |              | 11/20/2021 9:01:14 AM (UTC+08:00) |

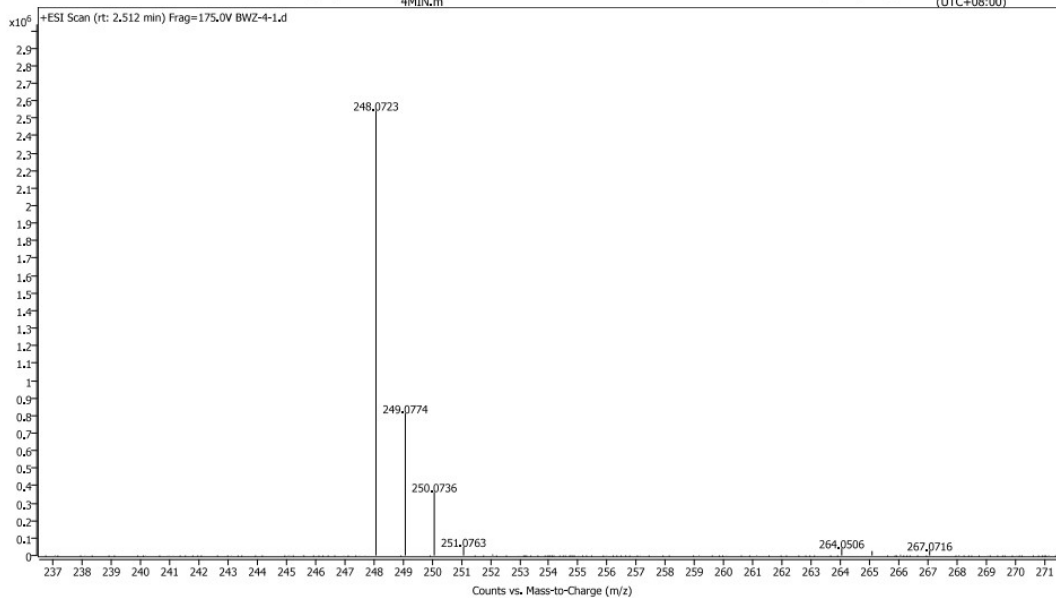

HRMS spectrum of compound **3c**

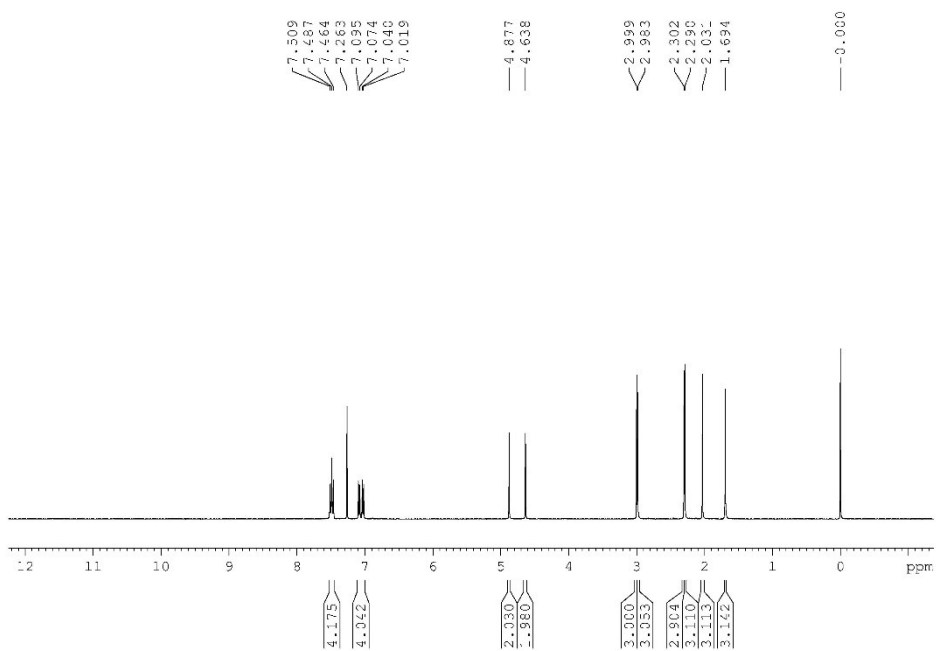

$^1\text{H}$  NMR spectrum of compound **3d**

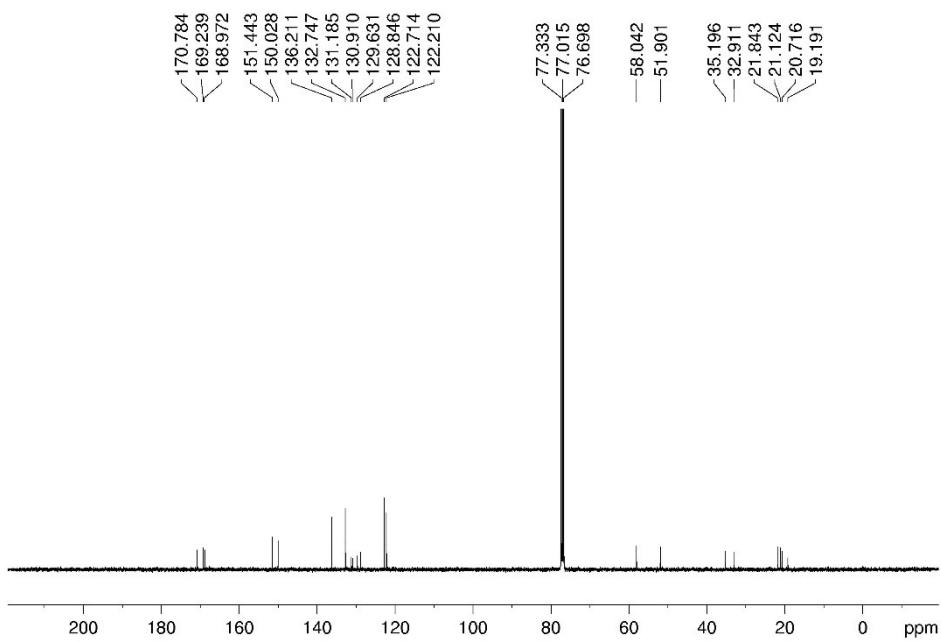

$^{13}\text{C}$  NMR spectrum of compound **3d**

# Spectrum Plot Report

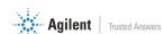

|                |         |              |                      |              |                                                      |
|----------------|---------|--------------|----------------------|--------------|------------------------------------------------------|
| Name           | bwz-8   | Rack Pos.    | Instrument           | Instrument 1 | Operator                                             |
| Inj. Vol. (ul) | 2       | Plate Pos.   | IRM Status           | Success      |                                                      |
| Data File      | BWZ-8.d | Method (Acq) | 20211212-bwz-4 min.m | Comment      | Acq. Time (Local) 12/12/2021 10:33:28 AM (UTC+08:00) |

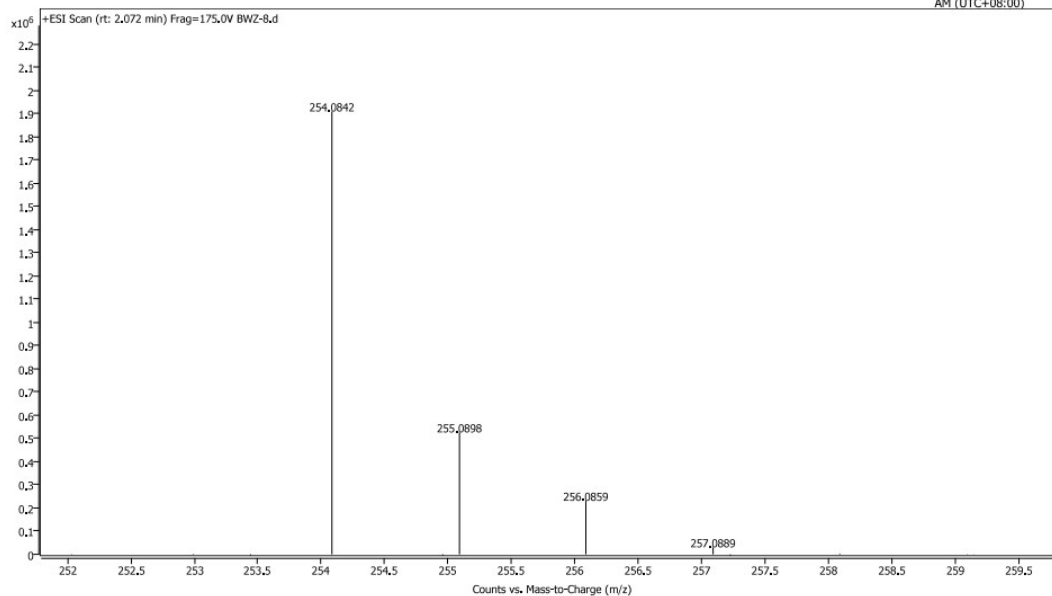

## HRMS spectrum of compound 3d

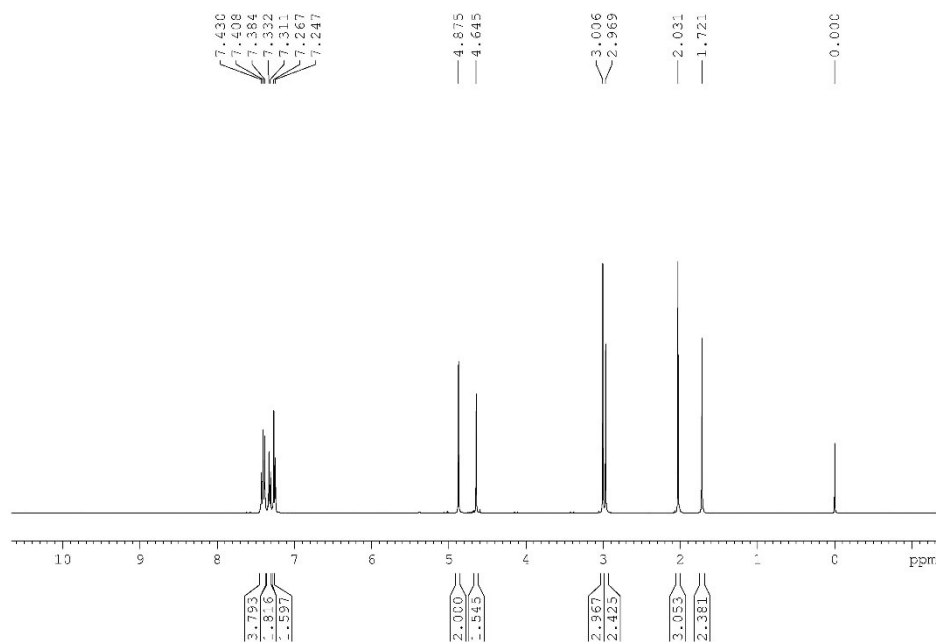

## <sup>1</sup>H NMR spectrum of compound 3e

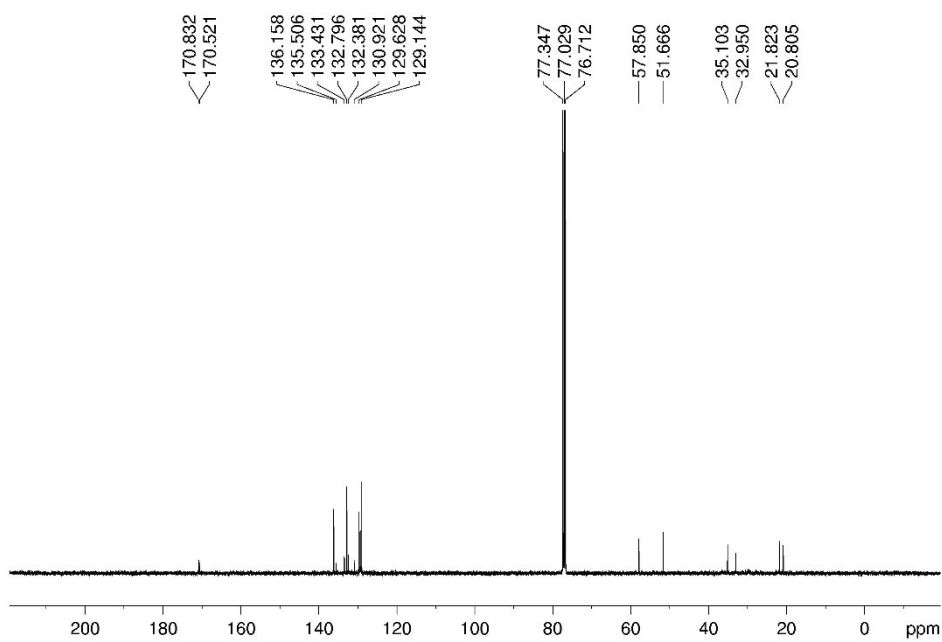

$^{13}\text{C}$  NMR spectrum of compound **3e**

### Spectrum Plot Report

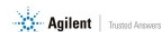

| Name      | Inj. Vol. (ul) | Rack Pos.  | Instrument            | Instrument 1 | Operator                          |
|-----------|----------------|------------|-----------------------|--------------|-----------------------------------|
| BWZ-3     | 2              | 2          | 20211119-4min -2 ul.m | Success      |                                   |
| Data File | Method (Acq)   | Plate Pos. | IRM Status            | Comment      | Acq. Time (Local)                 |
| BWZ-3.d   |                |            |                       |              | 11/19/2021 1:32:52 PM (UTC+08:00) |

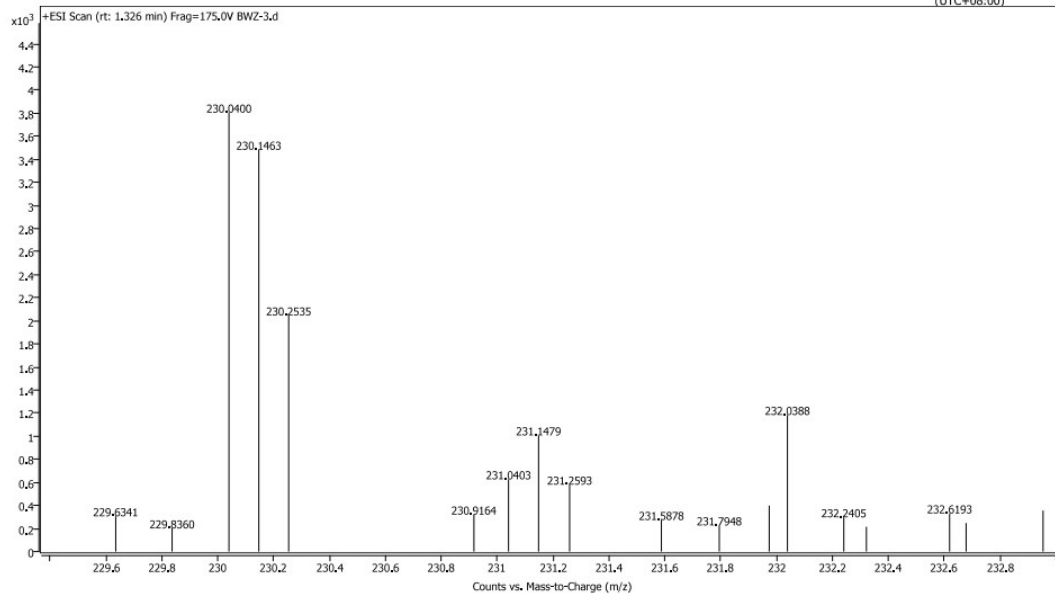

HRMS spectrum of compound **3e**

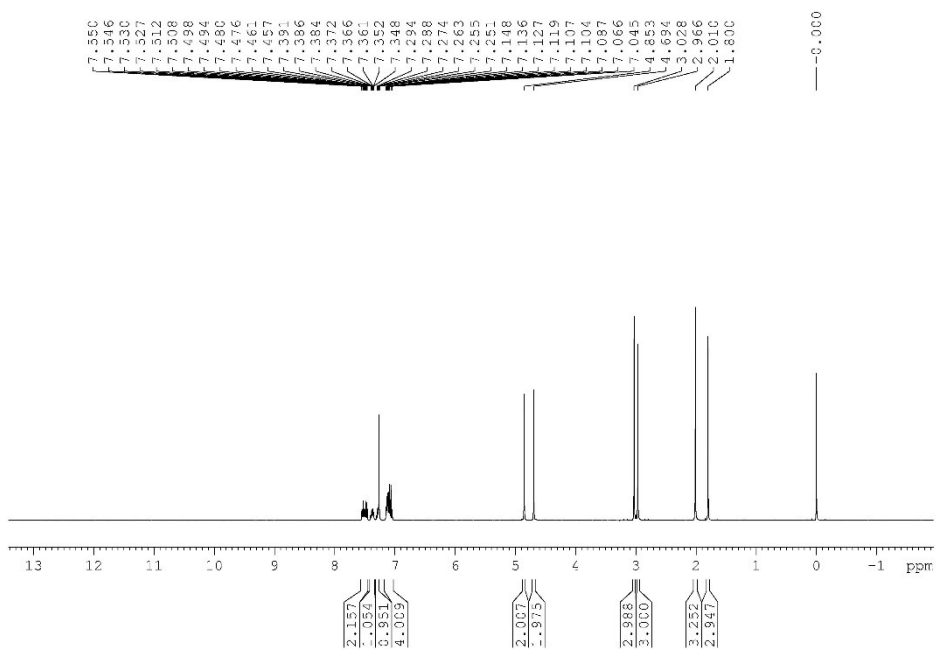

$^1\text{H}$  NMR spectrum of compound **3f**

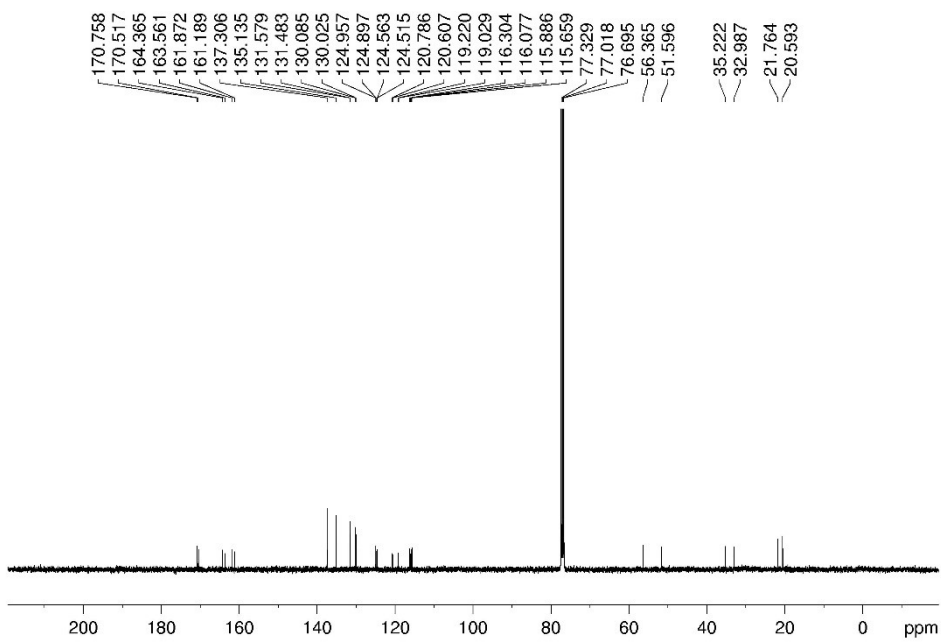

$^{13}\text{C}$  NMR spectrum of compound **3f**

# Spectrum Plot Report

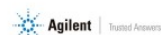

|                |         |              |                       |              |                                   |
|----------------|---------|--------------|-----------------------|--------------|-----------------------------------|
| Name           | BWZ-5   | Rack Pos.    | Instrument            | Instrument 1 | Operator                          |
| Inj. Vol. (ul) | 2       | Plate Pos.   | IRM Status            | Success      |                                   |
| Data File      | BWZ-5.d | Method (Acq) | 20211119-4min -2 ul.m | Comment      | Acq. Time (Local)                 |
|                |         |              |                       |              | 11/19/2021 1:44:05 PM (UTC+08:00) |

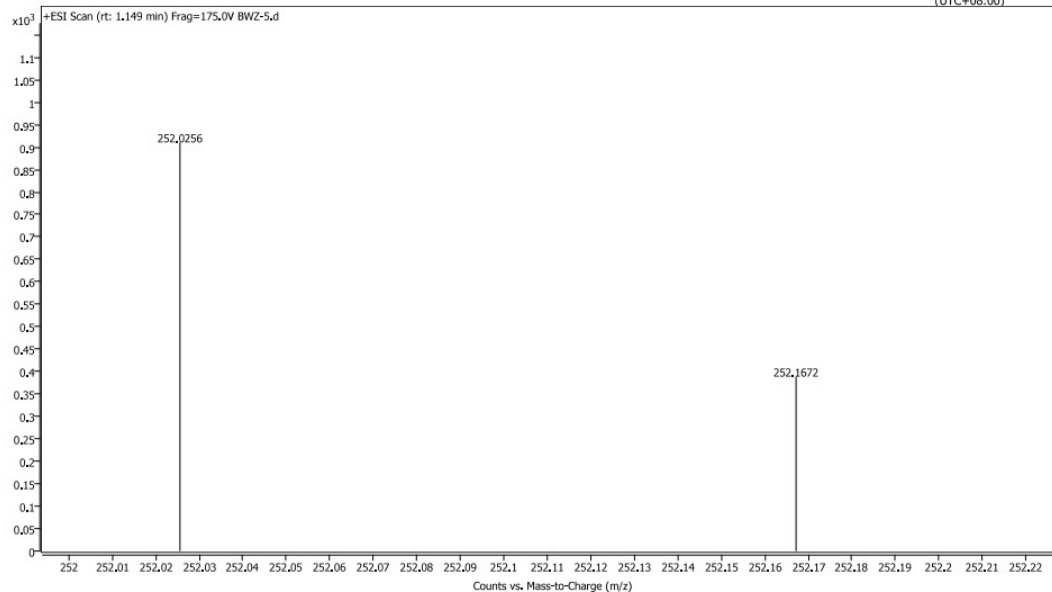

## HRMS spectrum of compound 3f

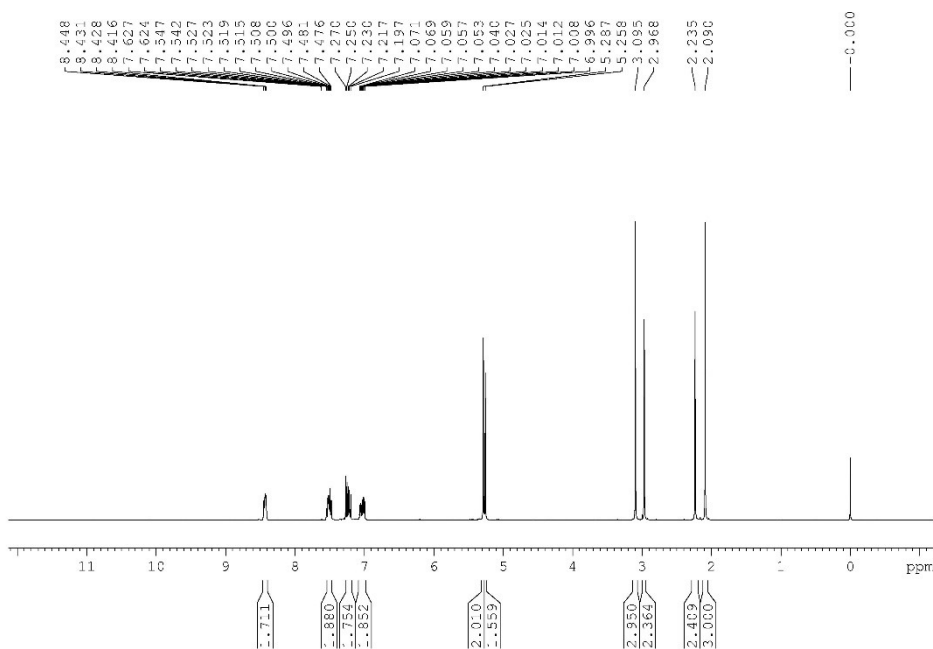

## <sup>1</sup>H NMR spectrum of compound 3g



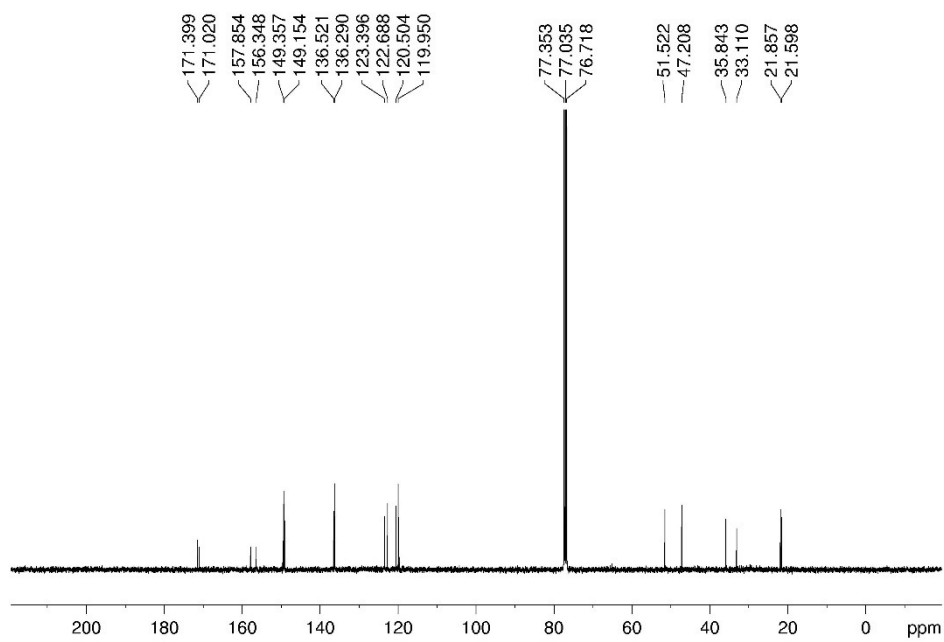

<sup>13</sup>C NMR spectrum of compound **3g**

### Spectrum Plot Report

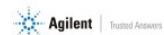

| Name           | BWZ-7   | Rack Pos.    | Instrument            | Instrument 1 | Operator                                            |
|----------------|---------|--------------|-----------------------|--------------|-----------------------------------------------------|
| Inj. Vol. (ul) | 2       | Plate Pos.   | IRM Status            | Success      |                                                     |
| Data File      | BWZ-7.d | Method (Acq) | 20211119-4min -2 ul.m | Comment      | Acq. Time (Local) 11/19/2021 1:56:29 PM (UTC+08:00) |

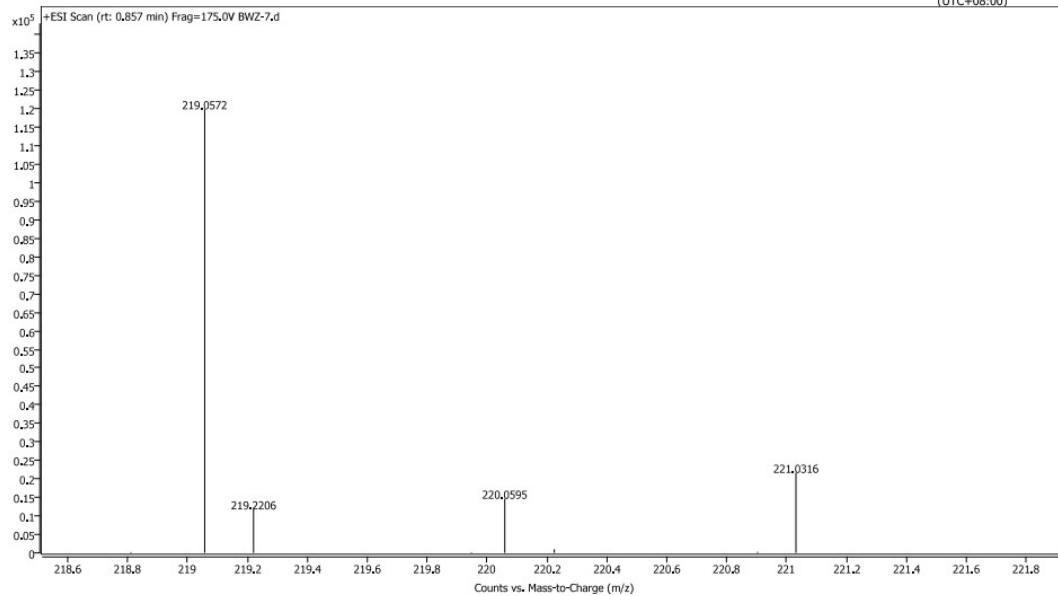

HRMS spectrum of compound **3g**

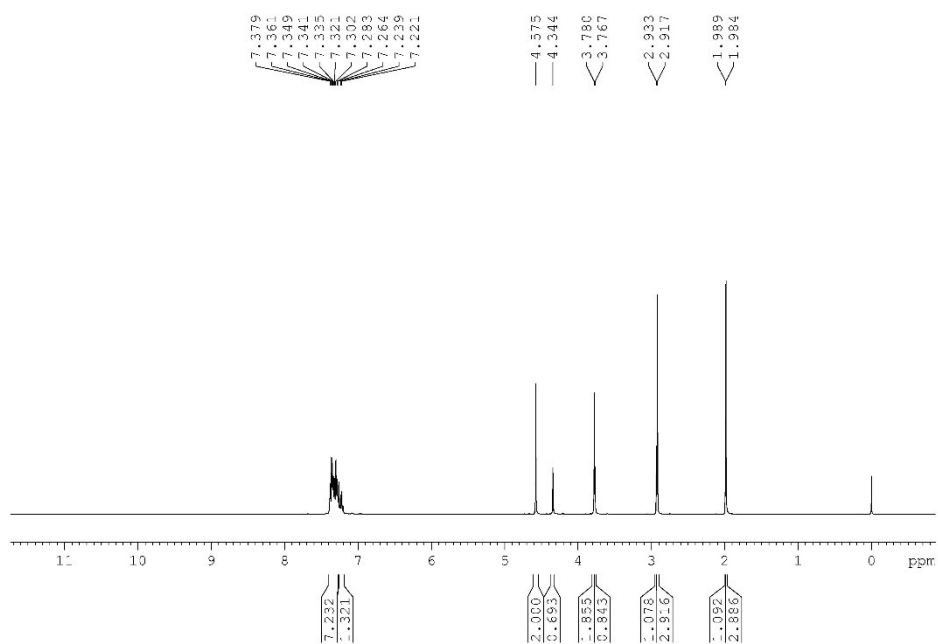

$^1\text{H}$  NMR spectrum of compound **3h**

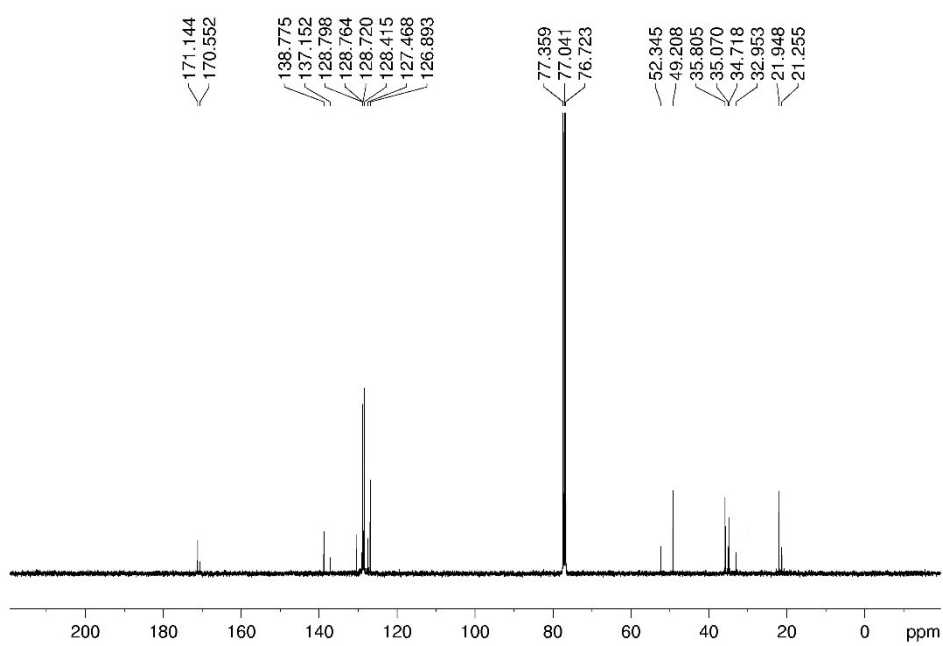

$^{13}\text{C}$  NMR spectrum of compound **3h**

# Spectrum Plot Report

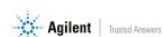

|                |         |              |                       |              |                                                     |
|----------------|---------|--------------|-----------------------|--------------|-----------------------------------------------------|
| Name           | BWZ-6   | Rack Pos.    | Instrument            | Instrument 1 | Operator                                            |
| Inj. Vol. (ul) | 2       | Plate Pos.   | IRM Status            | Success      |                                                     |
| Data File      | BWZ-6.d | Method (Acq) | 20211119-4min -2 ul.m | Comment      | Acq. Time (Local) 11/19/2021 1:49:07 PM (UTC+08:00) |

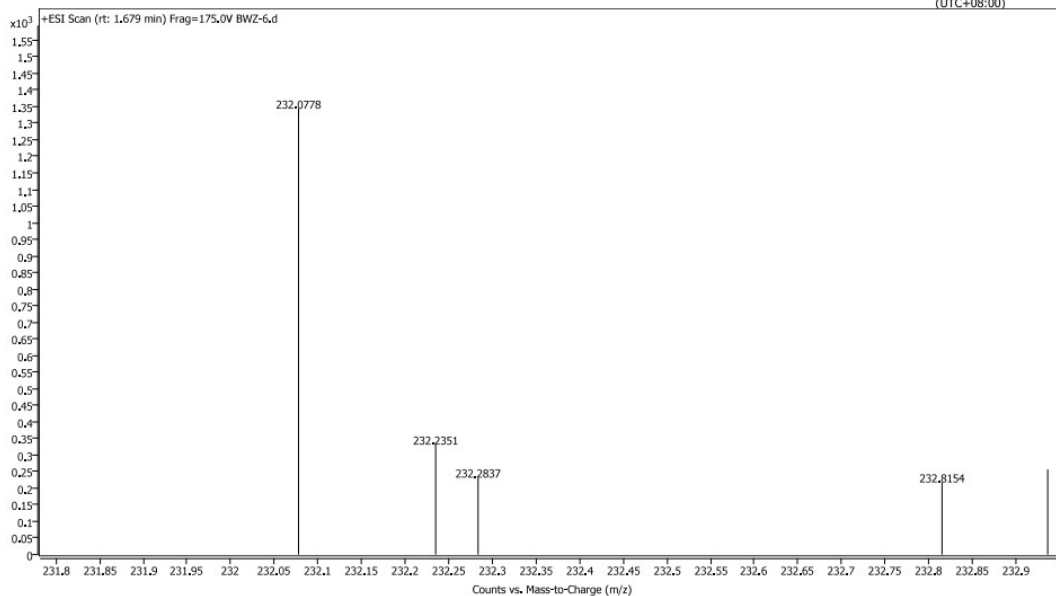

Page 1 of 1

Generated at 9:21 AM on 11/20/2021

## HRMS spectrum of compound 3h

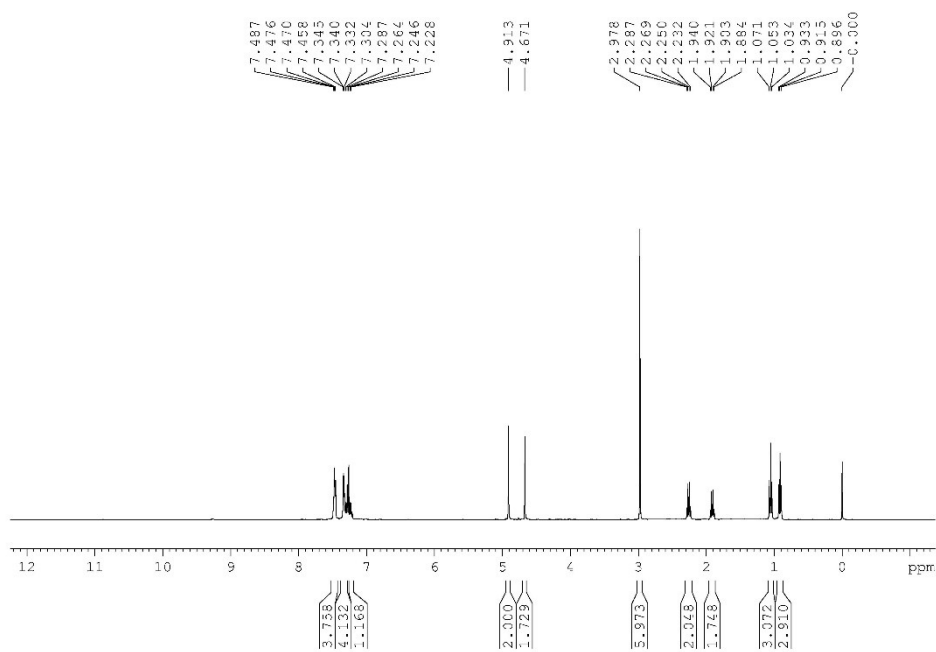

## <sup>1</sup>H NMR spectrum of compound 3k

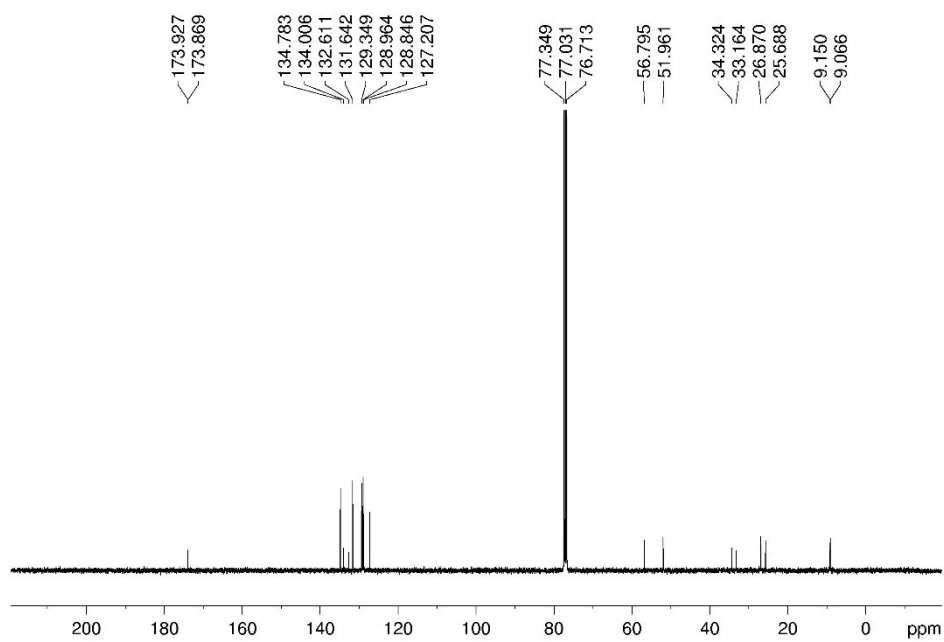

$^{13}\text{C}$  NMR spectrum of compound **3k**

### Spectrum Plot Report

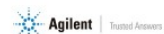

| Name           | bwz-13   | Rack Pos.    | Instrument           | Instrument 1 | Operator                           |
|----------------|----------|--------------|----------------------|--------------|------------------------------------|
| Inj. Vol. (ul) | 2        | Plate Pos.   | IRM Status           | Success      |                                    |
| Data File      | BWZ-13.d | Method (Acq) | 20211212-bwz-4 min.m | Comment      | Acq. Time (Local)                  |
|                |          |              |                      |              | 12/12/2021 10:57:21 AM (UTC+08:00) |

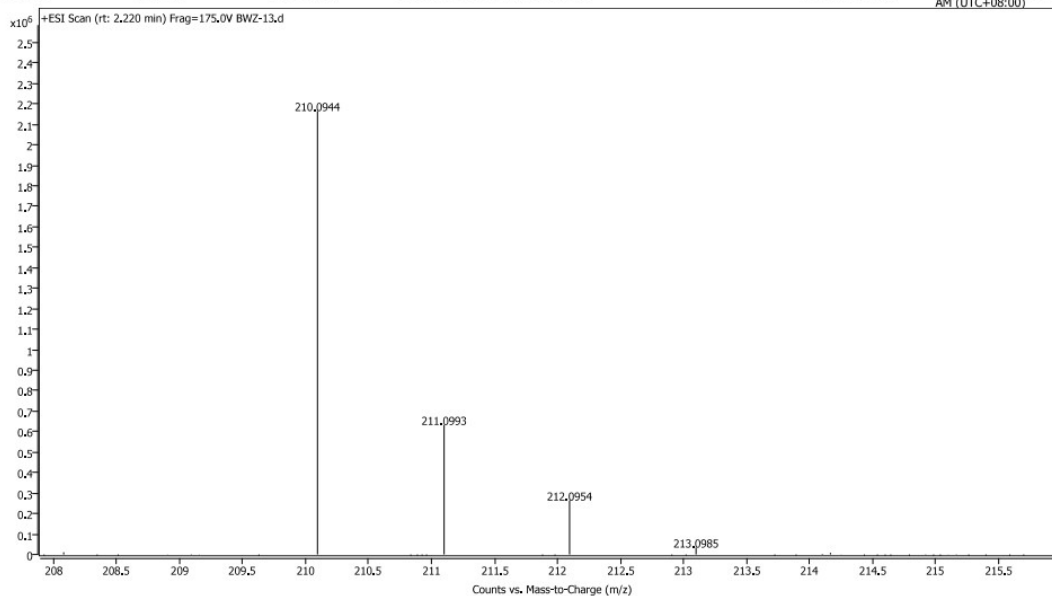

HRMS spectrum of compound **3k**

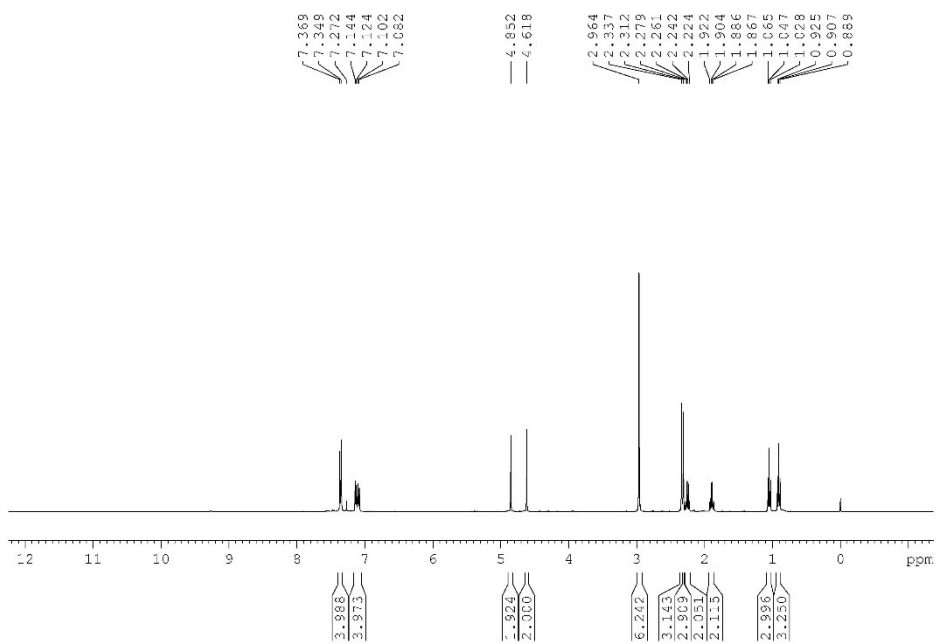

<sup>1</sup>H NMR spectrum of compound **31**

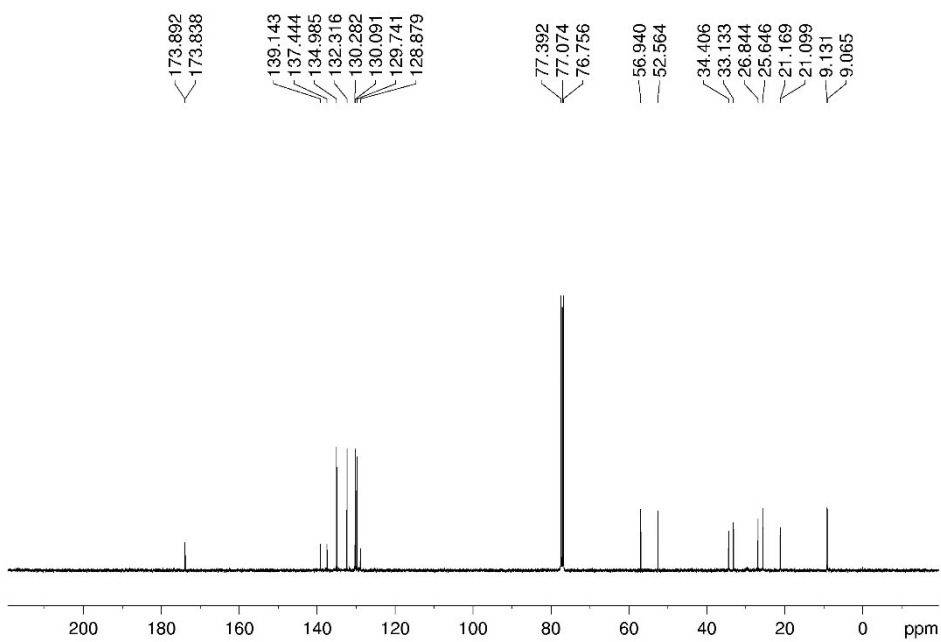

<sup>13</sup>C NMR spectrum of compound **31**

# Spectrum Plot Report

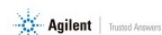

|                |          |              |                      |              |                                                      |
|----------------|----------|--------------|----------------------|--------------|------------------------------------------------------|
| Name           | bwz-16   | Rack Pos.    | Instrument           | Instrument 1 | Operator                                             |
| Inj. Vol. (ul) | 2        | Plate Pos.   | IRM Status           | Success      |                                                      |
| Data File      | BWZ-16.d | Method (Acq) | 20211212-bwz-4 min.m | Comment      | Acq. Time (Local) 12/12/2021 11:11:42 AM (UTC+08:00) |

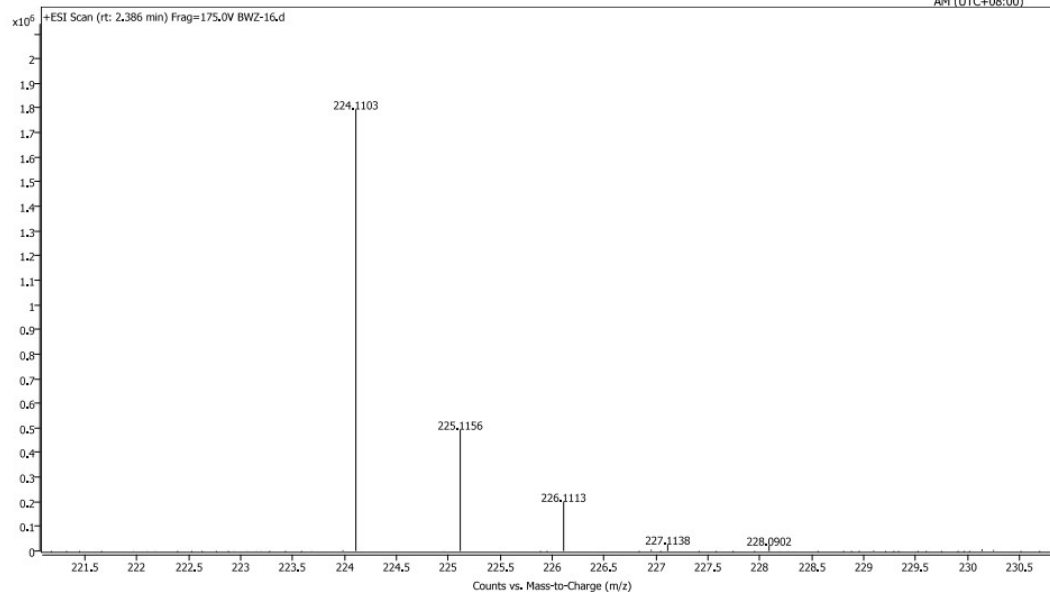

Page 1 of 1

Generated at 2:04 PM on 12/12/2021

## HRMS spectrum of compound 3l

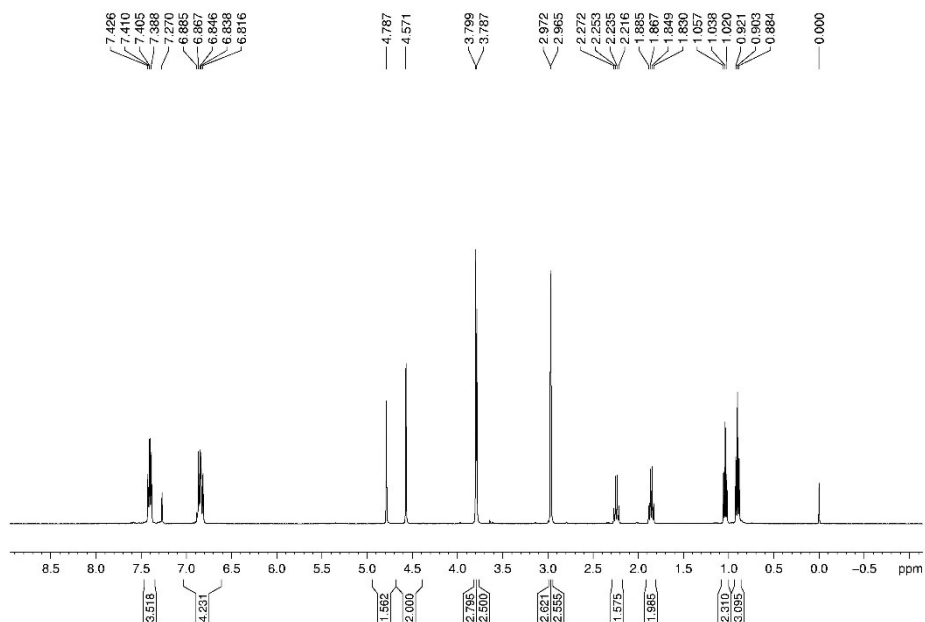

## <sup>1</sup>H NMR spectrum of compound 3m

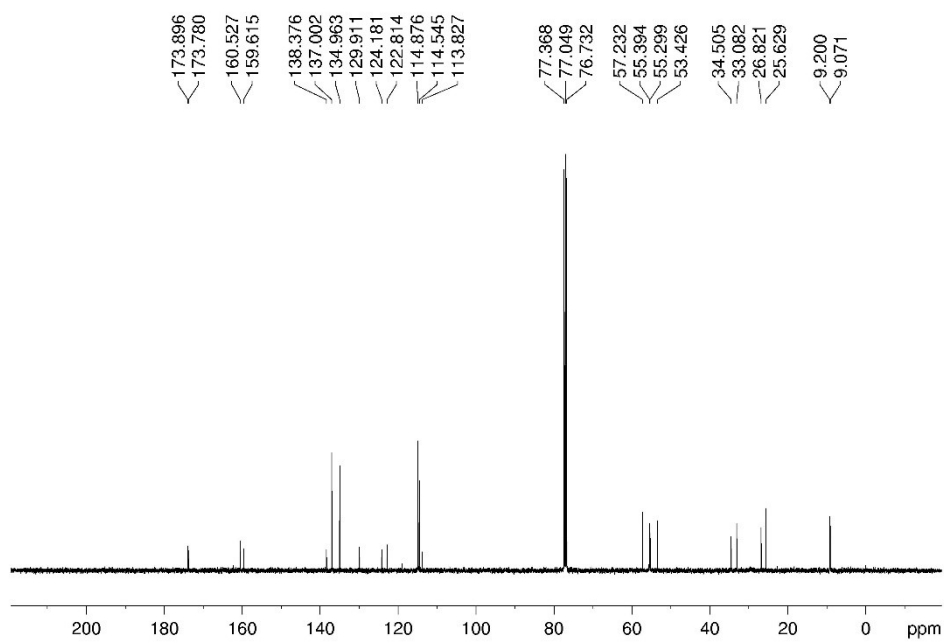

<sup>13</sup>C NMR spectrum of compound 3m

### Spectrum Plot Report

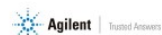

| Name           | bwz-17   | Rack Pos.    | Instrument           | Instrument 1 | Operator                                             |
|----------------|----------|--------------|----------------------|--------------|------------------------------------------------------|
| Inj. Vol. (ul) | 2        | Plate Pos.   | IRM Status           | Success      |                                                      |
| Data File      | BWZ-17.d | Method (Acq) | 20211212-bwz-4 min.m | Comment      | Acq. Time (Local) 12/12/2021 11:16:31 AM (UTC+08:00) |

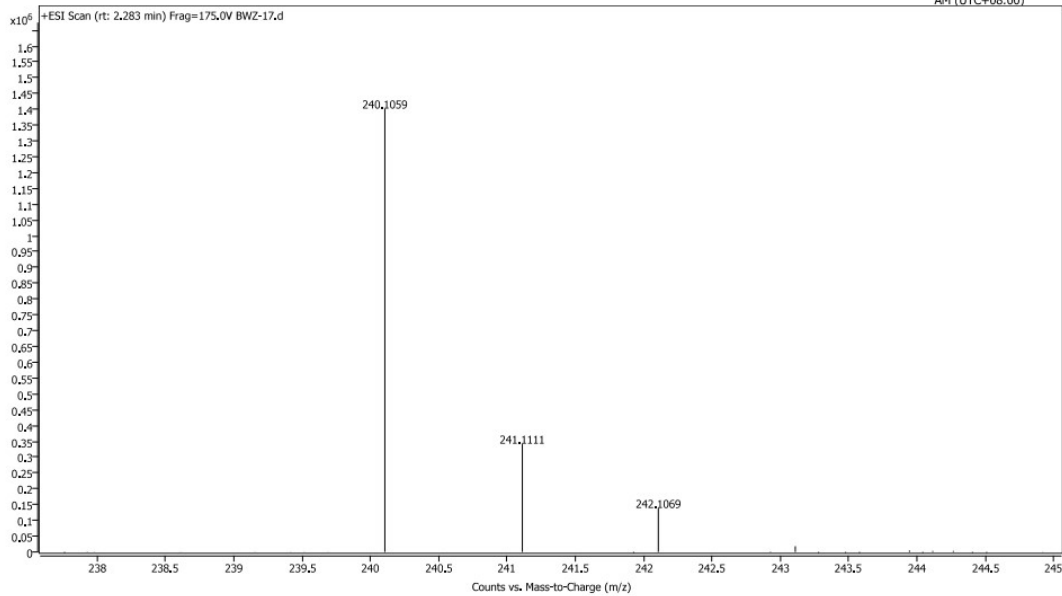

HRMS spectrum of compound 3m

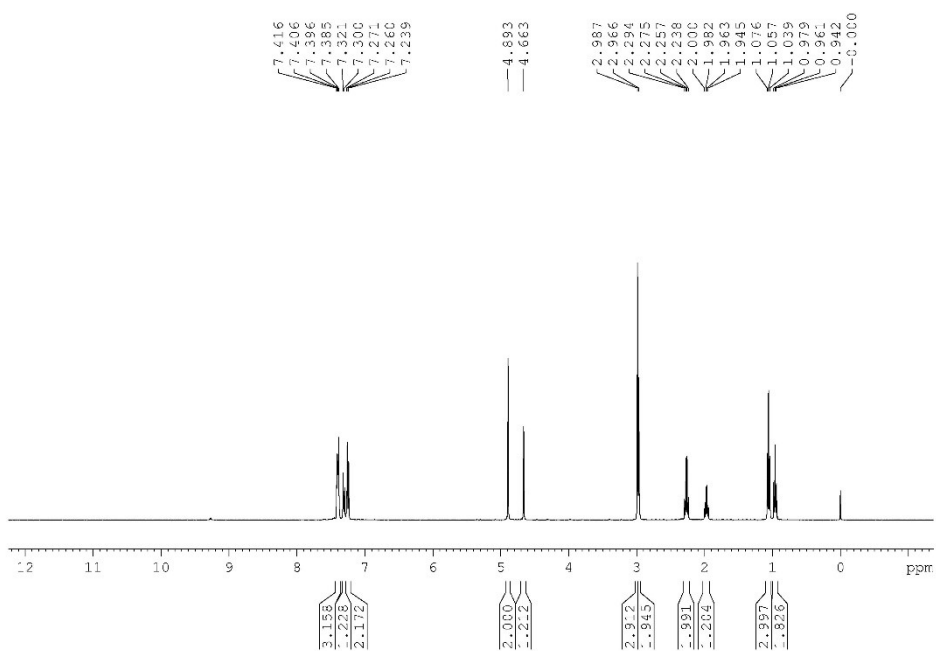

$^1\text{H}$  NMR spectrum of compound **3n**

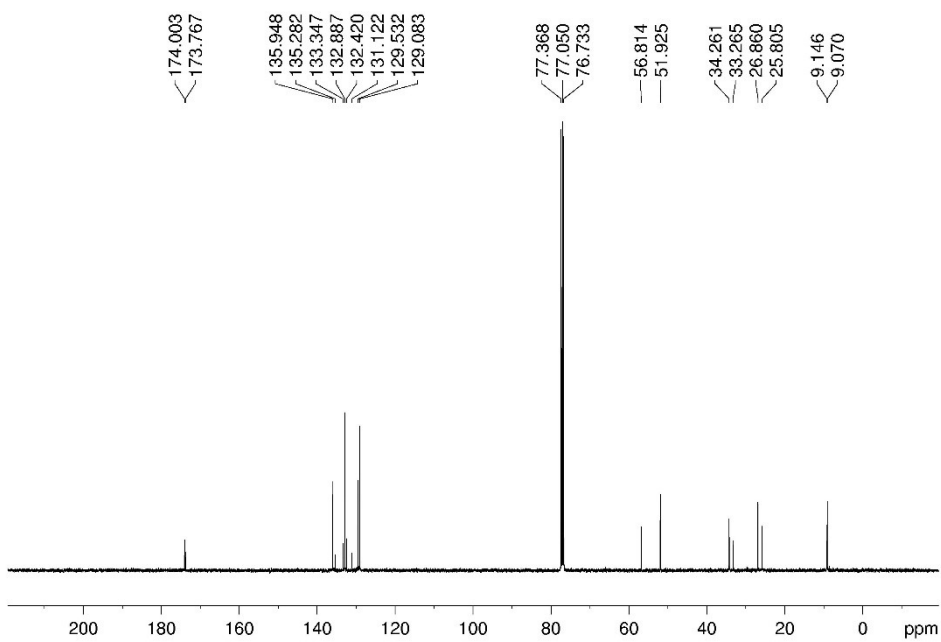

$^{13}\text{C}$  NMR spectrum of compound **3n**



# Spectrum Plot Report

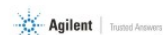

|                |          |              |                      |              |                                    |
|----------------|----------|--------------|----------------------|--------------|------------------------------------|
| Name           | bwz-15   | Rack Pos.    | Instrument           | Instrument 1 | Operator                           |
| Inj. Vol. (µl) | 2        | Plate Pos.   | IRM Status           | Success      |                                    |
| Data File      | BWZ-15.d | Method (Acq) | 20211212-bwz-4 min.m | Comment      | Acq. Time (Local)                  |
|                |          |              |                      |              | 12/12/2021 11:06:54 AM (UTC+08:00) |

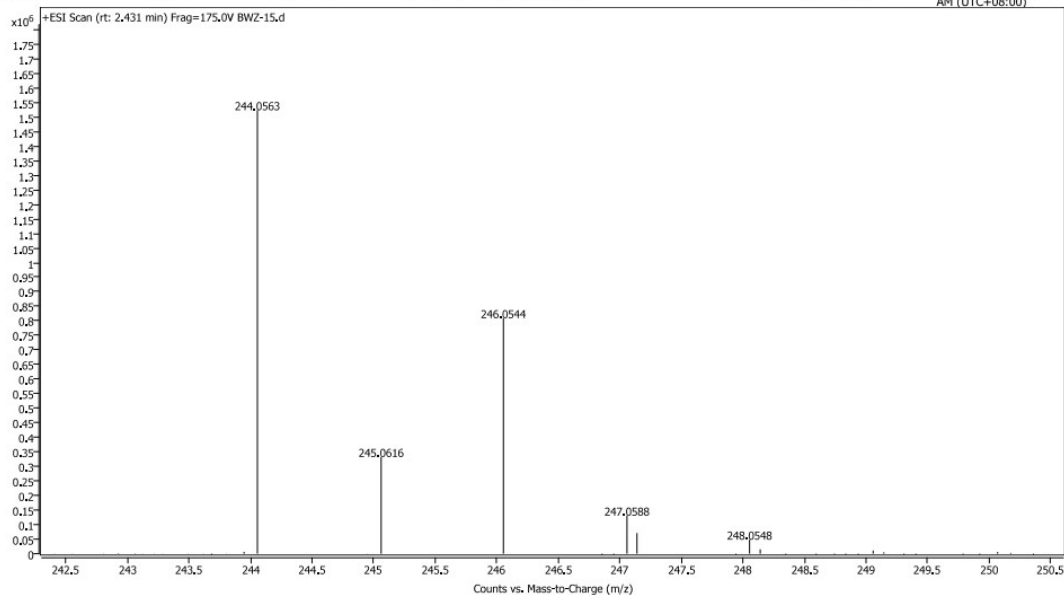

Page 1 of 1

Generated at 2:02 PM on 12/12/2021

## HRMS spectrum of compound 3n

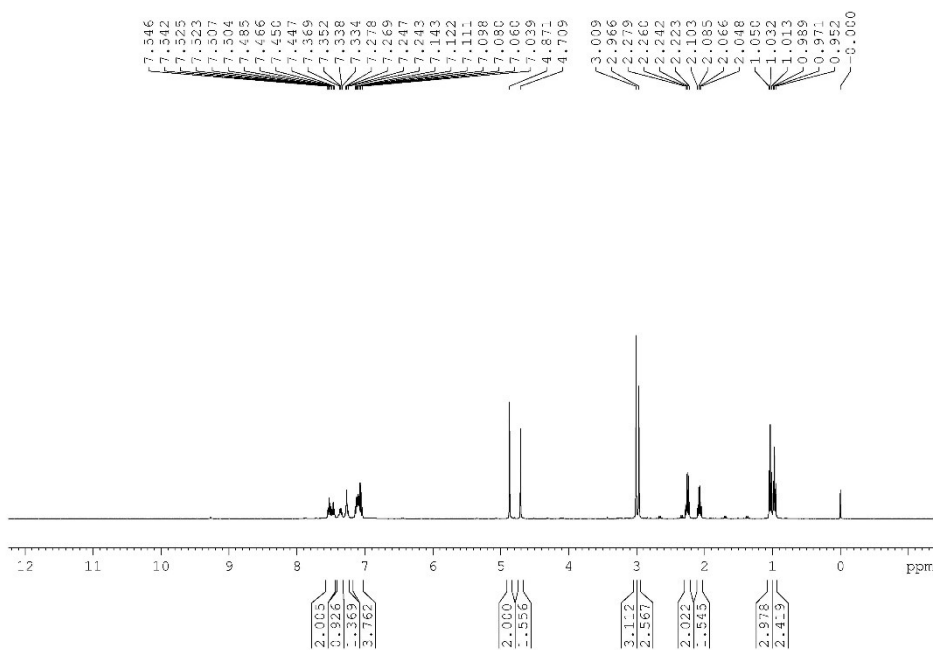

## <sup>1</sup>H NMR spectrum of compound 3o

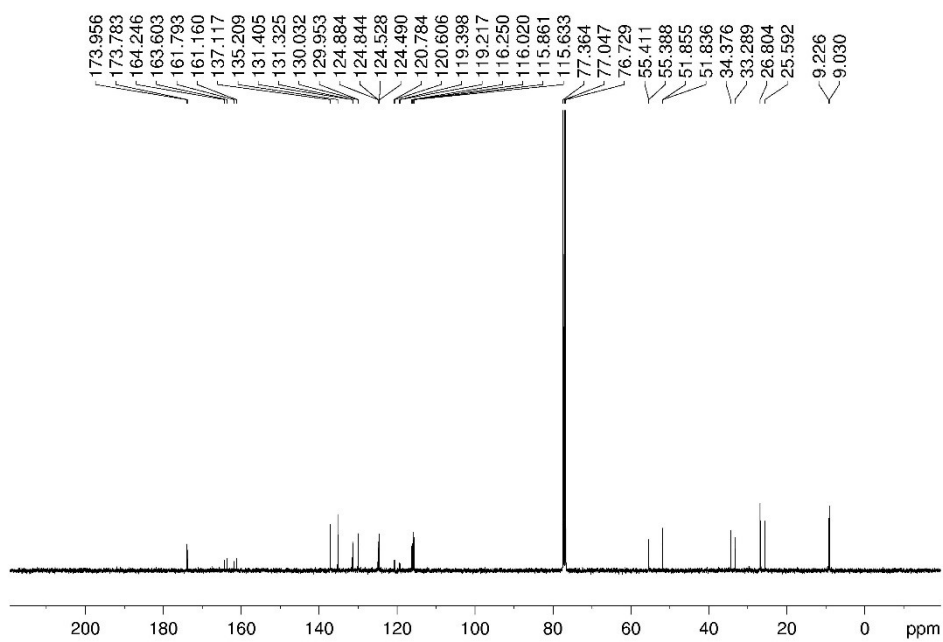

<sup>13</sup>C NMR spectrum of compound **3o**

### Spectrum Plot Report

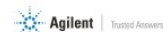

|                |          |              |                      |              |                                    |
|----------------|----------|--------------|----------------------|--------------|------------------------------------|
| Name           | bwz-14   | Rack Pos.    | Instrument           | Instrument 1 | Operator                           |
| Inj. Vol. (ul) | 2        | Plate Pos.   | IRM Status           | Success      |                                    |
| Data File      | BWZ-14.d | Method (Acq) | 20211212-bwz-4 min.m | Comment      | Acq. Time (Local)                  |
|                |          |              |                      |              | 12/12/2021 11:02:09 AM (UTC+08:00) |

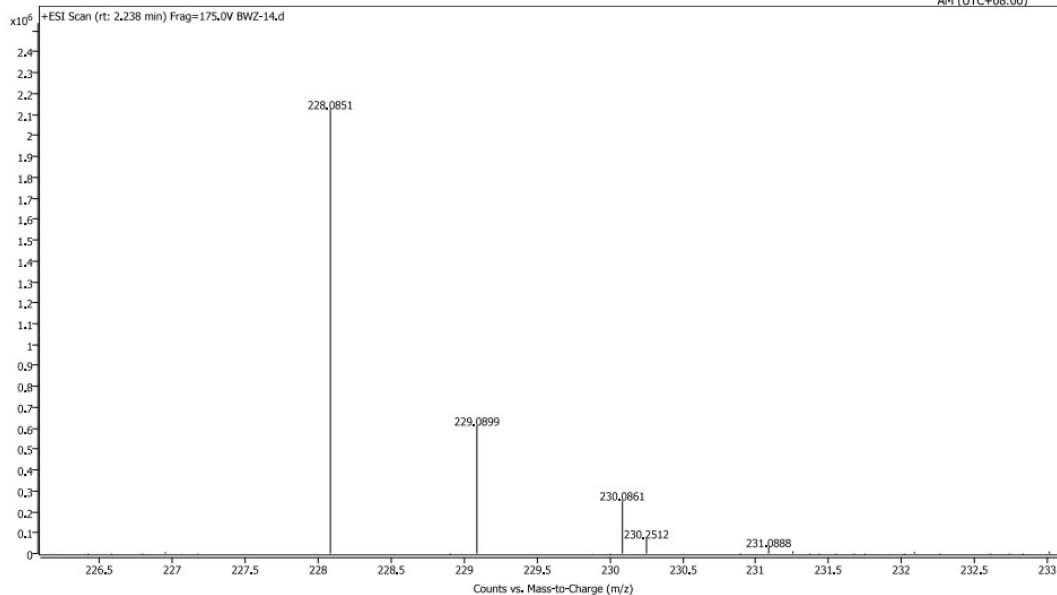

HRMS spectrum of compound **3o**

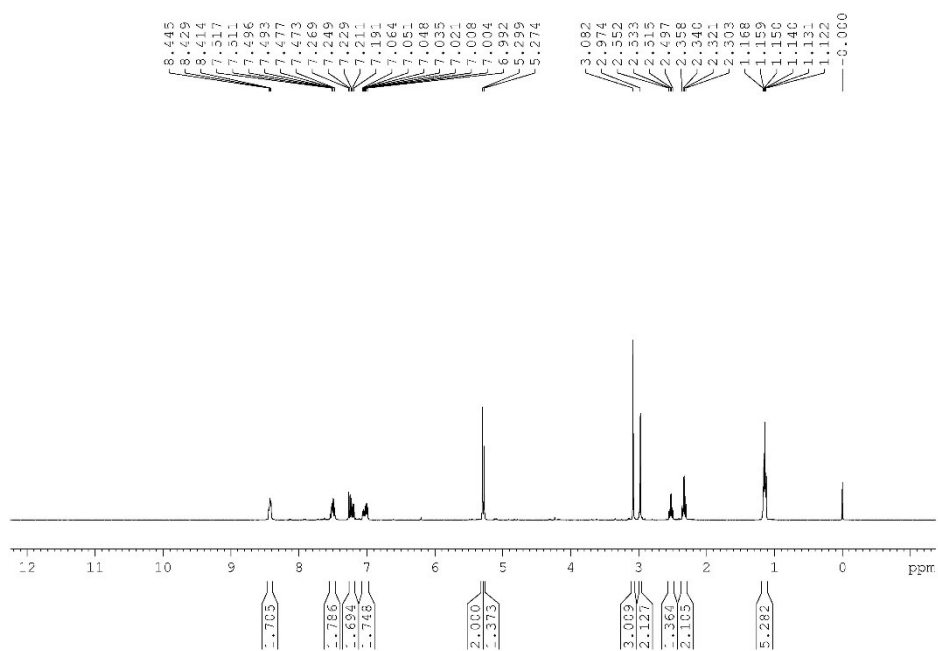

$^1\text{H}$  NMR spectrum of compound **3p**

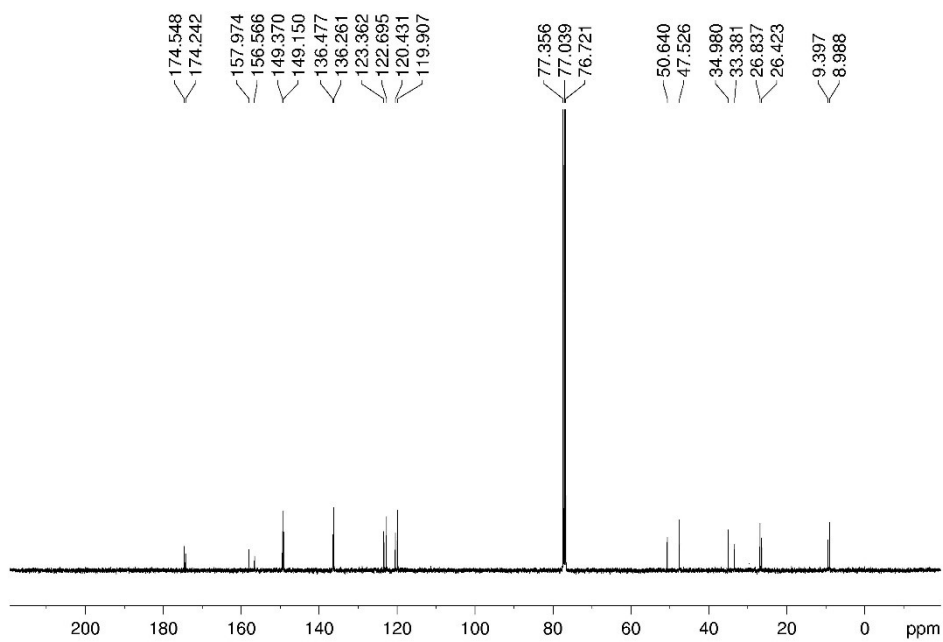

$^{13}\text{C}$  NMR spectrum of compound **3p**

# Spectrum Plot Report

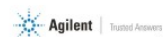

|                |          |              |                      |              |                                    |
|----------------|----------|--------------|----------------------|--------------|------------------------------------|
| Name           | bwz-19   | Rack Pos.    | Instrument           | Instrument 1 | Operator                           |
| Inj. Vol. (µl) | 2        | Plate Pos.   | IRM Status           | Success      |                                    |
| Data File      | BWZ-19.d | Method (Acq) | 20211212-bwz-4 min.m | Comment      | Acq. Time (Local)                  |
|                |          |              |                      |              | 12/12/2021 11:26:02 AM (UTC+08:00) |

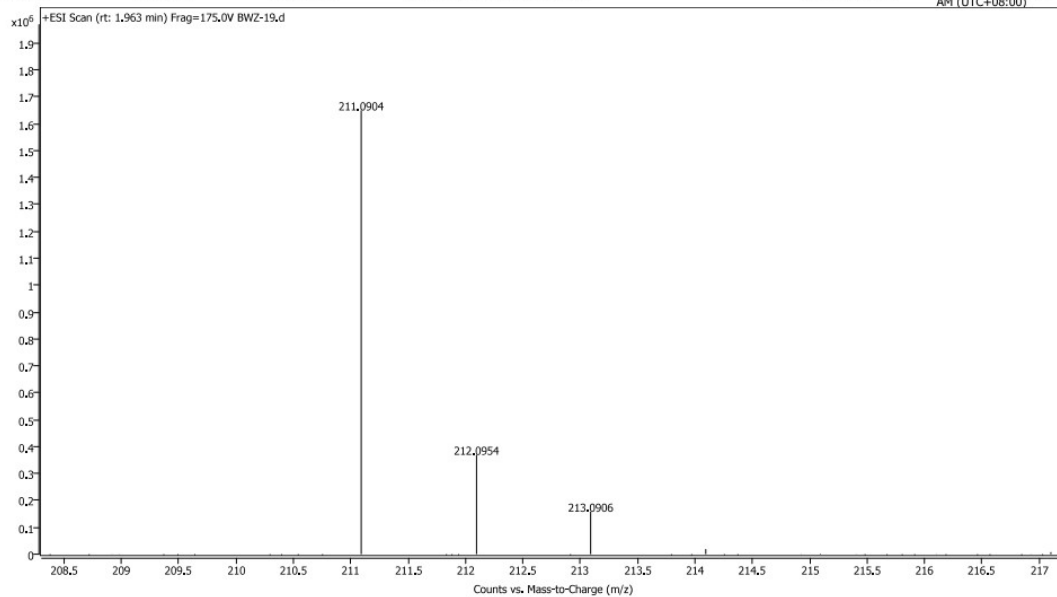

Page 1 of 1

Generated at 2:10 PM on 12/12/2021

## HRMS spectrum of compound 3p

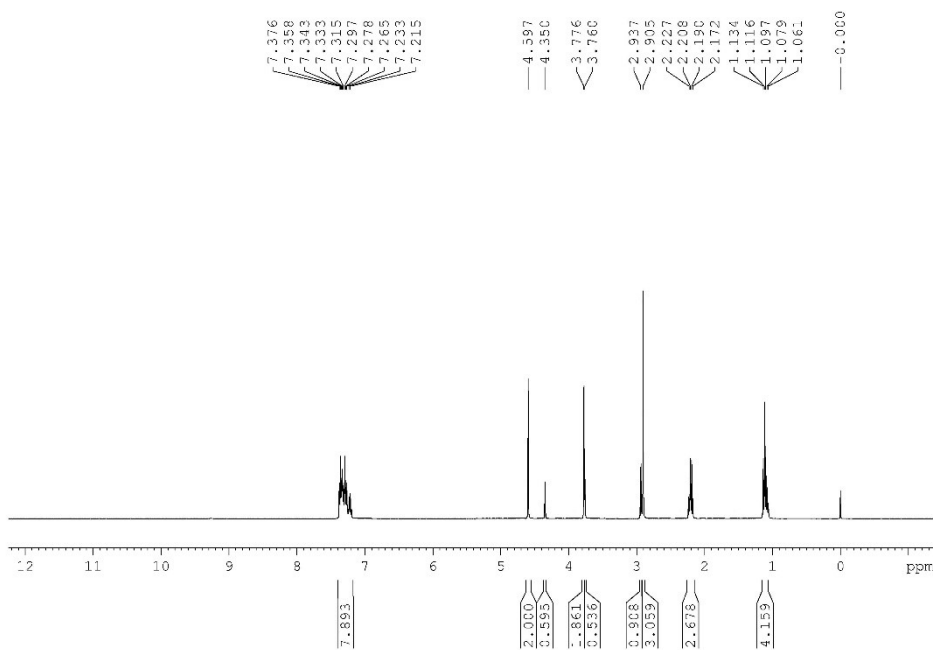

## <sup>1</sup>H NMR spectrum of compound 3q

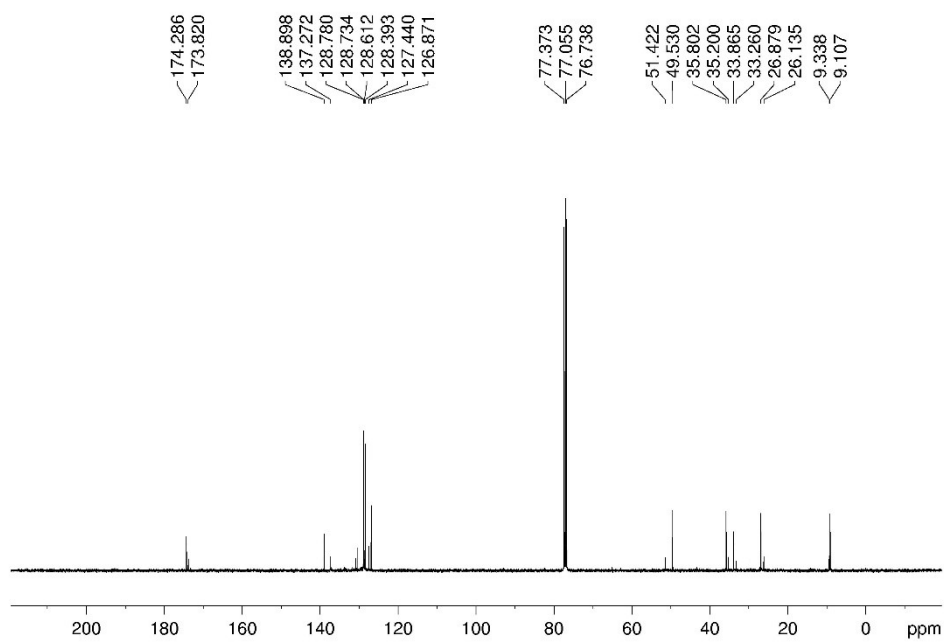

<sup>13</sup>C NMR spectrum of compound **3q**

### Spectrum Plot Report

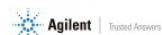

| Name           | bwz-18   | Rack Pos.    | Instrument           | Instrument 1 | Operator                           |
|----------------|----------|--------------|----------------------|--------------|------------------------------------|
| Inj. Vol. (μl) | 2        | Plate Pos.   | IRM Status           | Success      |                                    |
| Data File      | BWZ-18.d | Method (Acq) | 20211212-bwz-4 min.m | Comment      | Acq. Time (Local)                  |
|                |          |              |                      |              | 12/12/2021 11:21:16 AM (UTC+08:00) |

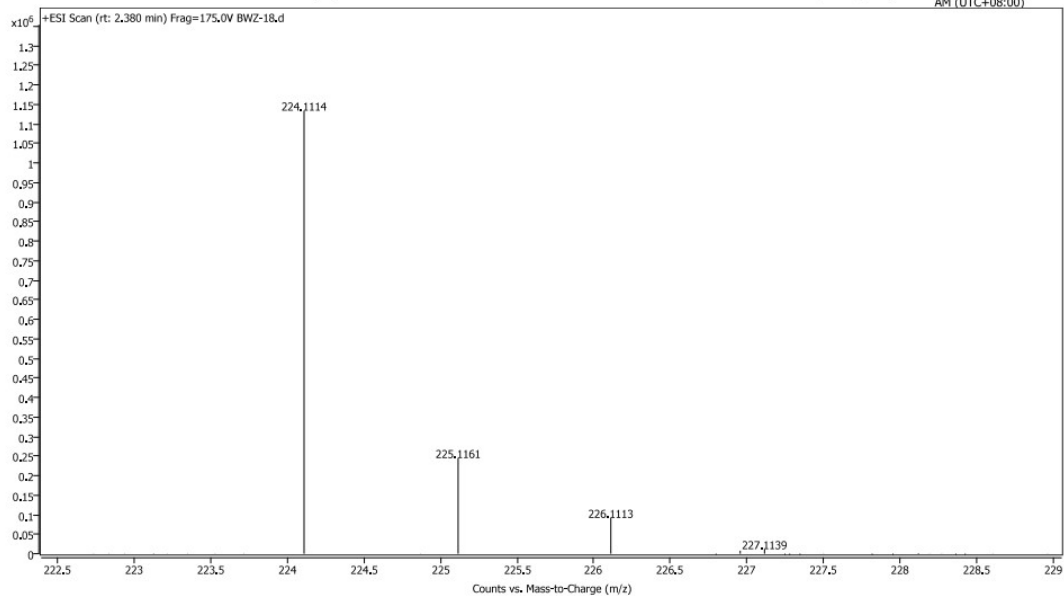

HRMS spectrum of compound **3q**

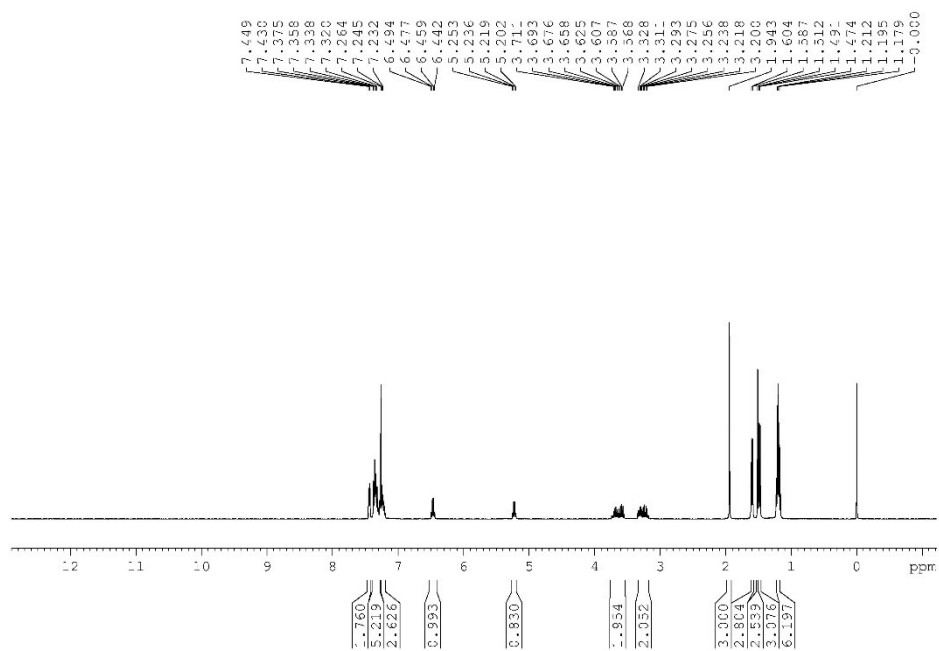

<sup>1</sup>H NMR spectrum of compound **3r**

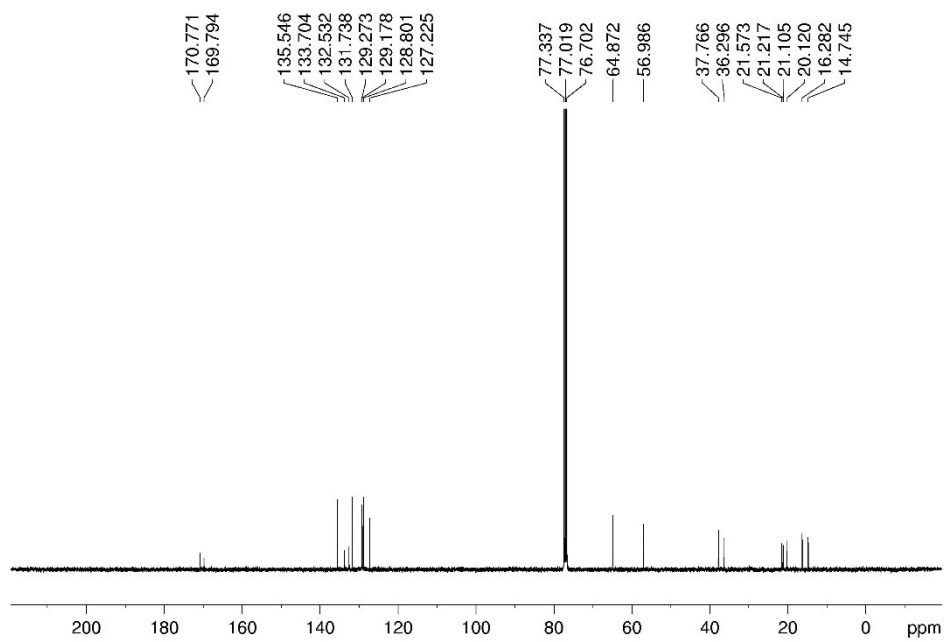

<sup>13</sup>C NMR spectrum of compound **3r**

# Spectrum Plot Report

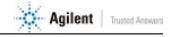

Name: Inj. Vol. (ul) 2, Data File: BWZ-2.d, Rack Pos. 2, Plate Pos. BWZ-2.d, Method (Acq): 20211212-bwz-4 min.m, Instrument: IRM Status, Comment: Instrument 1 Success, Operator: Acq. Time (Local) 12/12/2021 9:38:22 AM (UTC+08:00)

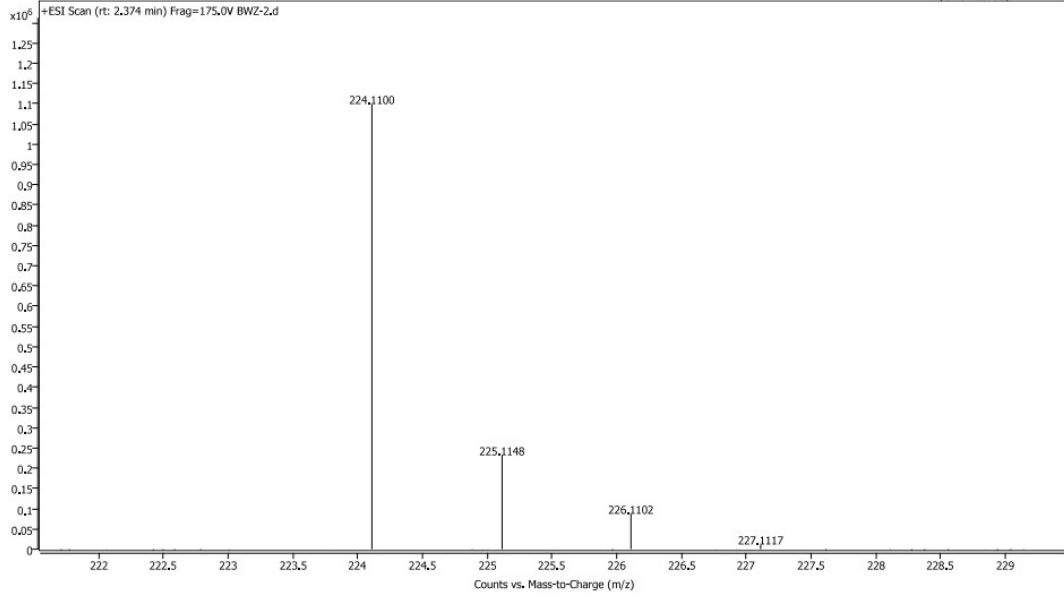

## HRMS spectrum of compound **3r**

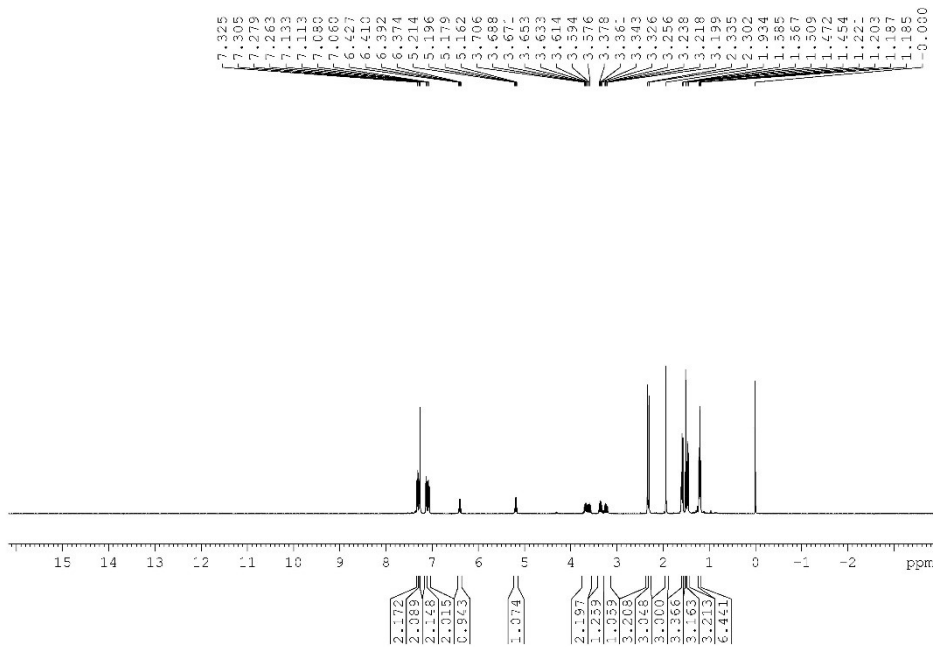

## <sup>1</sup>H NMR spectrum of compound **3s**

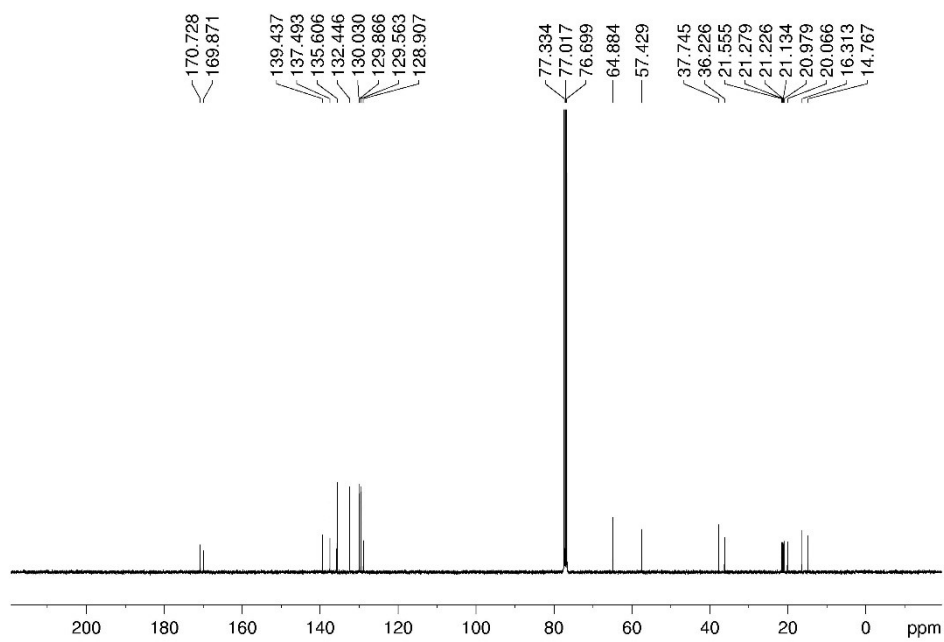

<sup>13</sup>C NMR spectrum of compound **3s**

Spectrum Plot Report

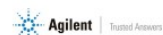

| Name           | bwz-4-1   | Rack Pos.    | Instrument           | Instrument 1 | Operator                           |
|----------------|-----------|--------------|----------------------|--------------|------------------------------------|
| Inj. Vol. (ul) | 2         | Plate Pos.   | IRMS                 | Success      |                                    |
| Data File      | BWZ-4-1.d | Method (Acq) | 20211212-bwz-4 min.m | Comment      | Acq. Time (Local)                  |
|                |           |              |                      |              | 12/12/2021 10:14:17 AM (UTC+08:00) |

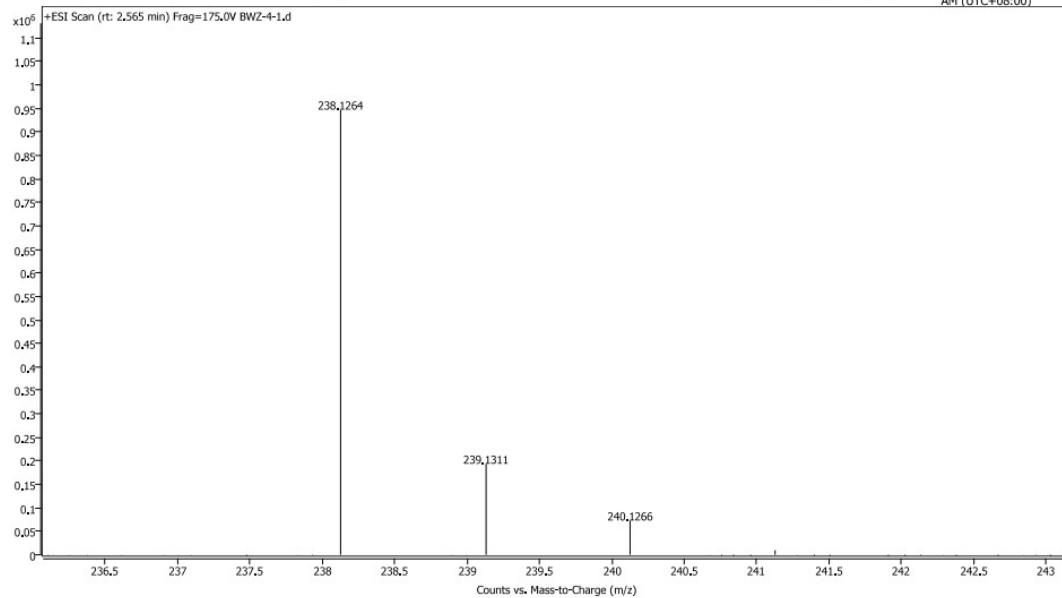

HRMS spectrum of compound **3s**



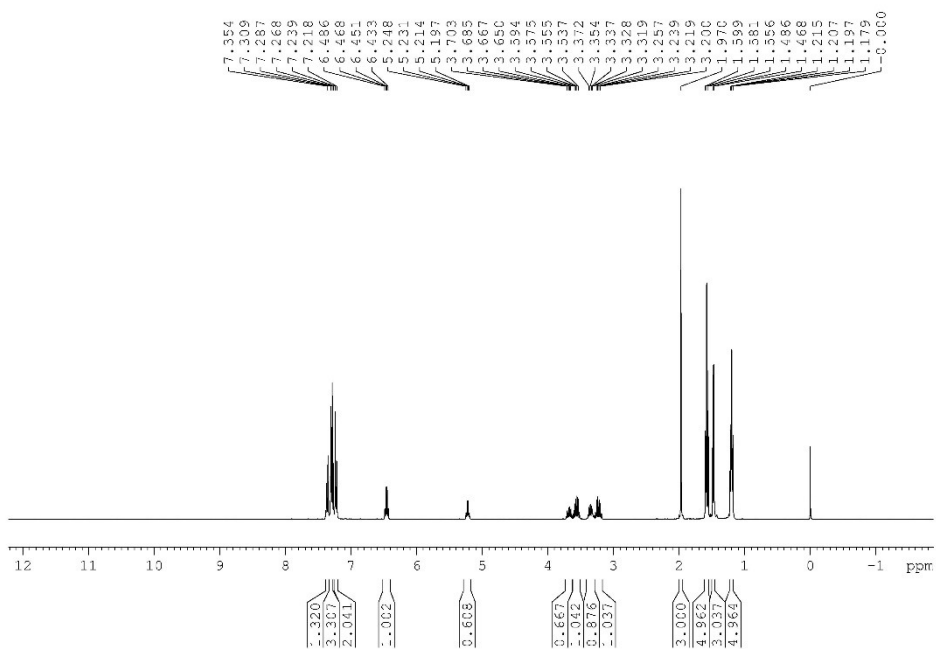

<sup>1</sup>H NMR spectrum of compound **3t**

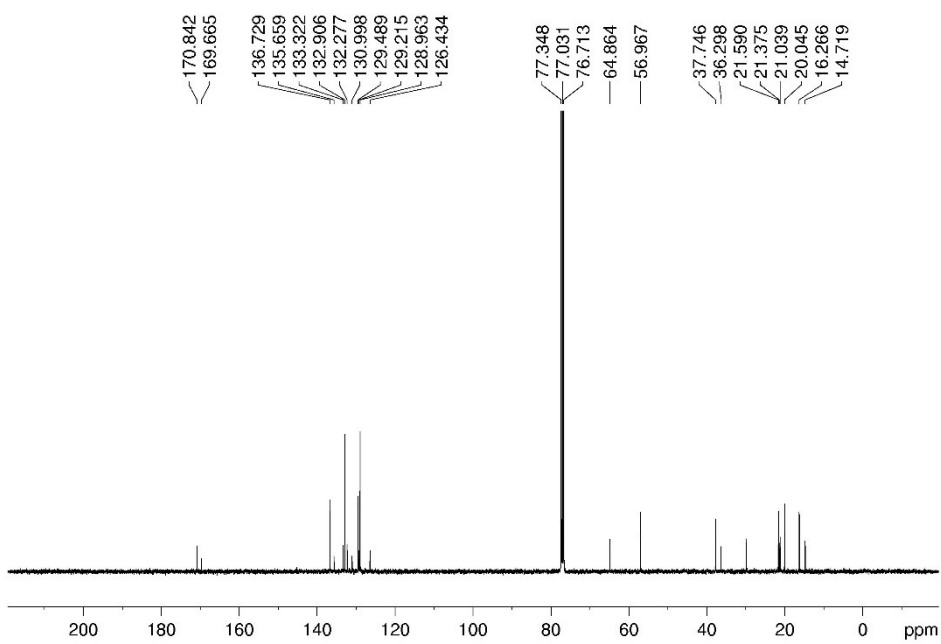

<sup>13</sup>C NMR spectrum of compound **3t**

# Spectrum Plot Report

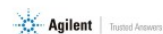

|                |           |              |                      |              |                                    |
|----------------|-----------|--------------|----------------------|--------------|------------------------------------|
| Name           | bwz-3-3   | Rack Pos.    | Instrument           | Instrument 1 | Operator                           |
| Inj. Vol. (ul) | 2         | Plate Pos.   | IRM Status           | Success      |                                    |
| Data File      | BWZ-3-3.d | Method (Acq) | 20211212-bwz-4 min.m | Comment      | Acc. Time (Local)                  |
|                |           |              |                      |              | 12/12/2021 11:30:49 AM (UTC+08:00) |

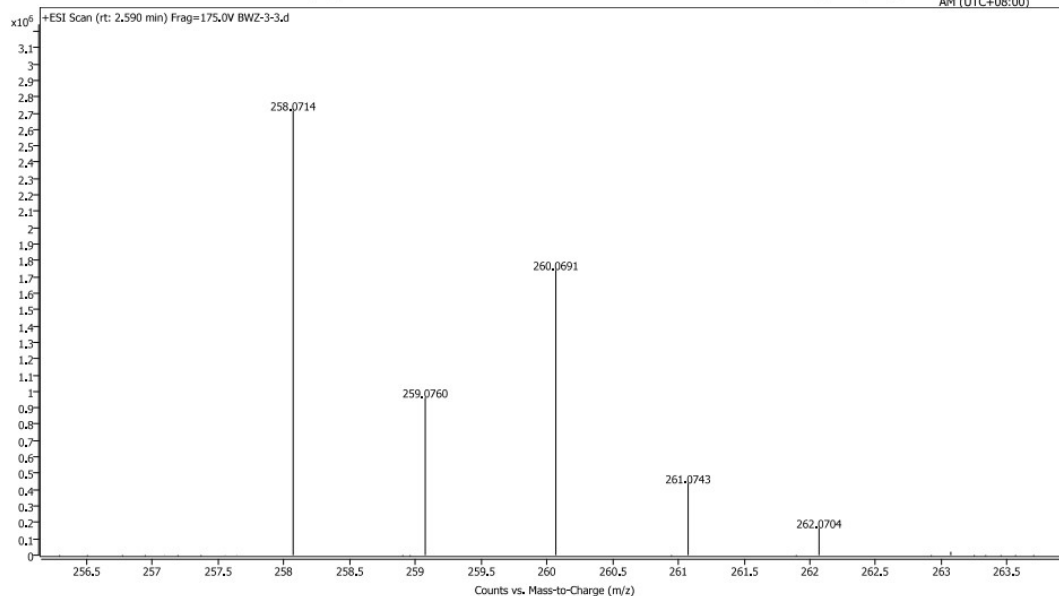

Page 1 of 1

Generated at 1:46 PM on 12/12/2021

## HRMS spectrum of compound 3t

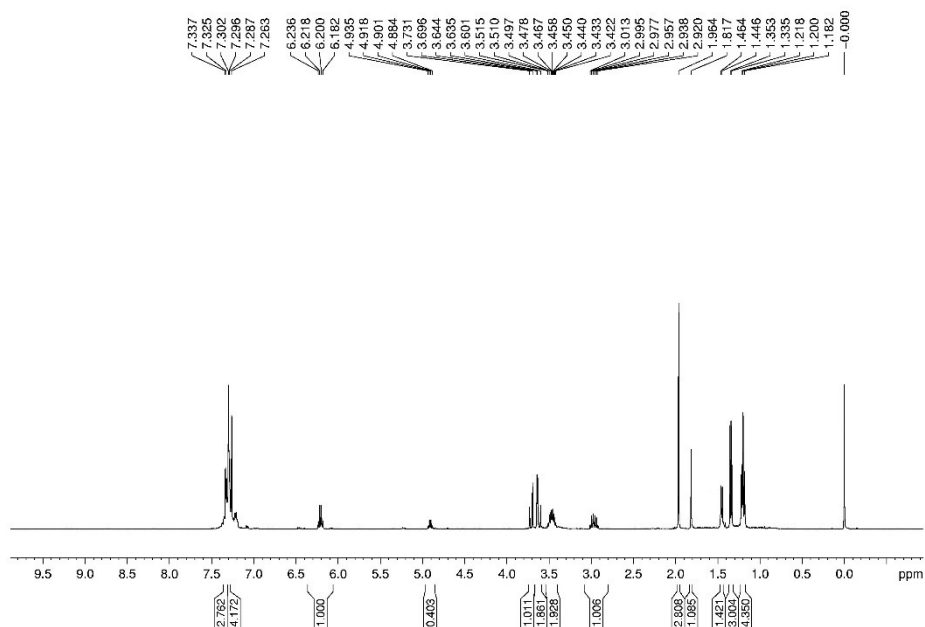

## <sup>1</sup>H NMR spectrum of compound 3u

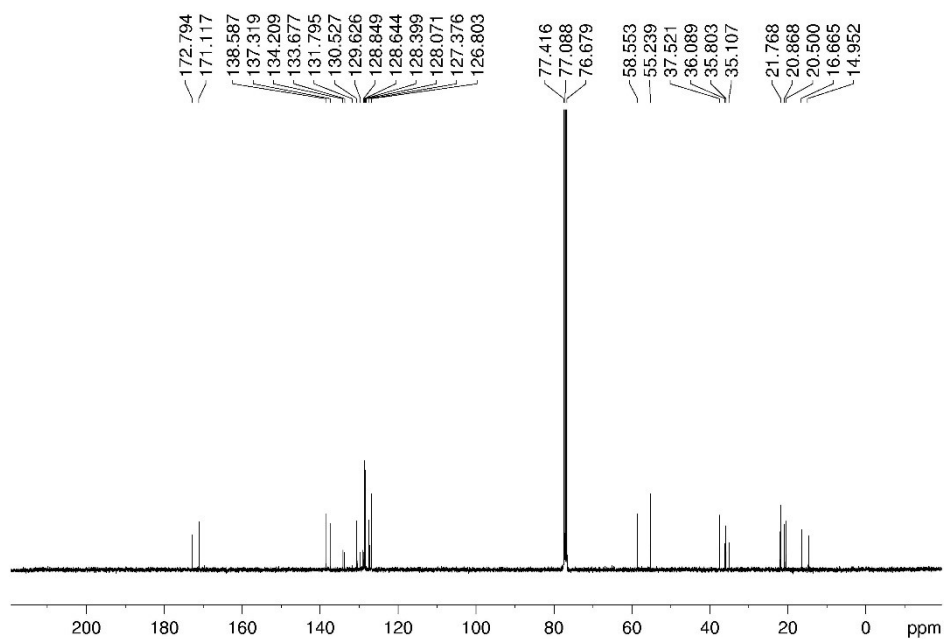

$^{13}\text{C}$  NMR spectrum of compound **3u**

### Spectrum Plot Report

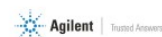

| Name           | bwz-6   | Rack Pos.    | Instrument           | Instrument 1 | Operator                           |
|----------------|---------|--------------|----------------------|--------------|------------------------------------|
| Inj. Vol. (ul) | 2       | Plate Pos.   | IRM Status           | Success      |                                    |
| Data File      | BWZ-6.d | Method (Acq) | 20211212-bwz-4 min.m | Comment      | Acq. Time (Local)                  |
|                |         |              |                      |              | 12/12/2021 10:23:50 AM (UTC+08:00) |

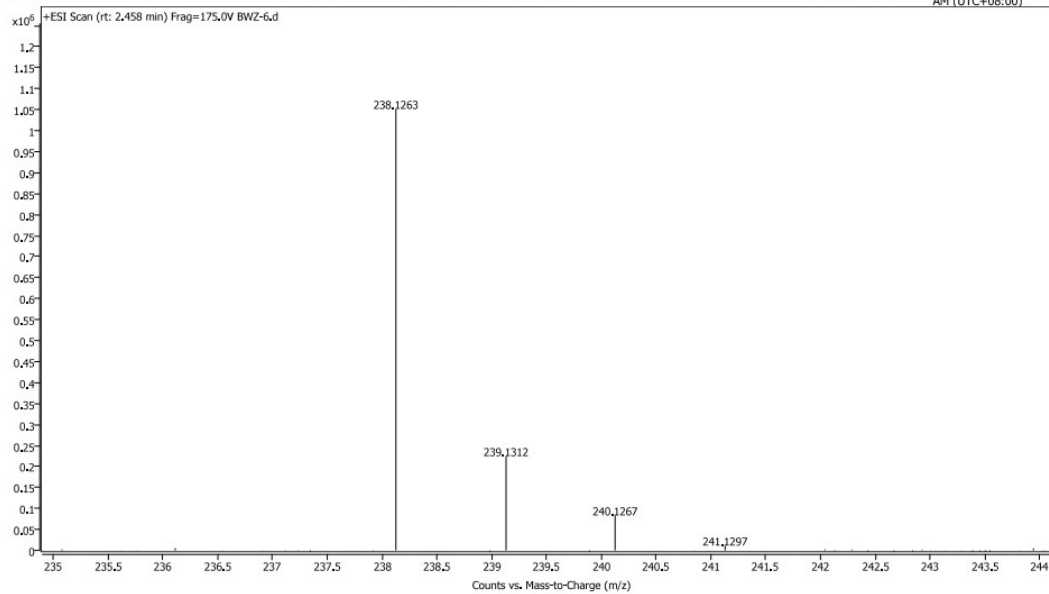

HRMS spectrum of compound **3u**

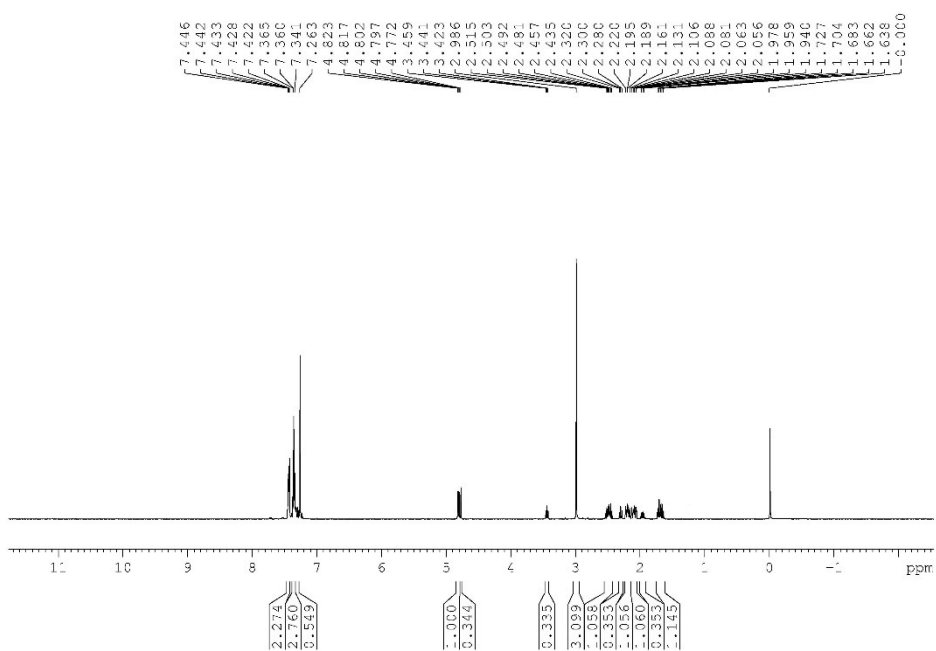

<sup>1</sup>H NMR spectrum of compound **3w**

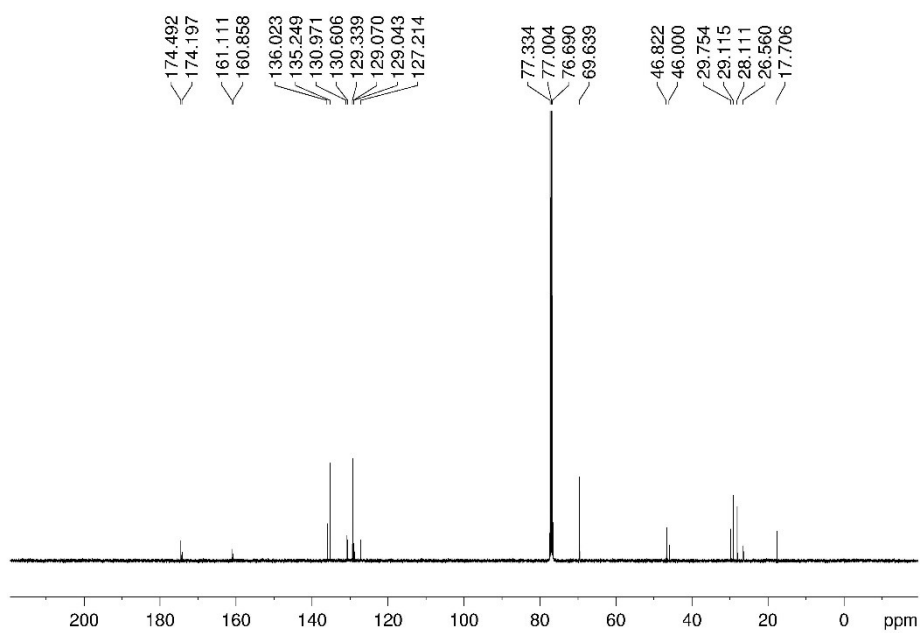

<sup>13</sup>C NMR spectrum of compound **3w**

# Spectrum Plot Report

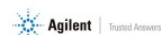

|                |         |              |                      |              |                                    |
|----------------|---------|--------------|----------------------|--------------|------------------------------------|
| Name           | bwz-7   | Rack Pos.    | Instrument           | Instrument 1 | Operator                           |
| Inj. Vol. (µl) | 2       | Plate Pos.   | IRM Status           | Success      |                                    |
| Data File      | BWZ-7.d | Method (Acq) | 20211212-bwz-4 min.m | Comment      | Acq. Time (Local)                  |
|                |         |              |                      |              | 12/12/2021 10:28:40 AM (UTC+08:00) |

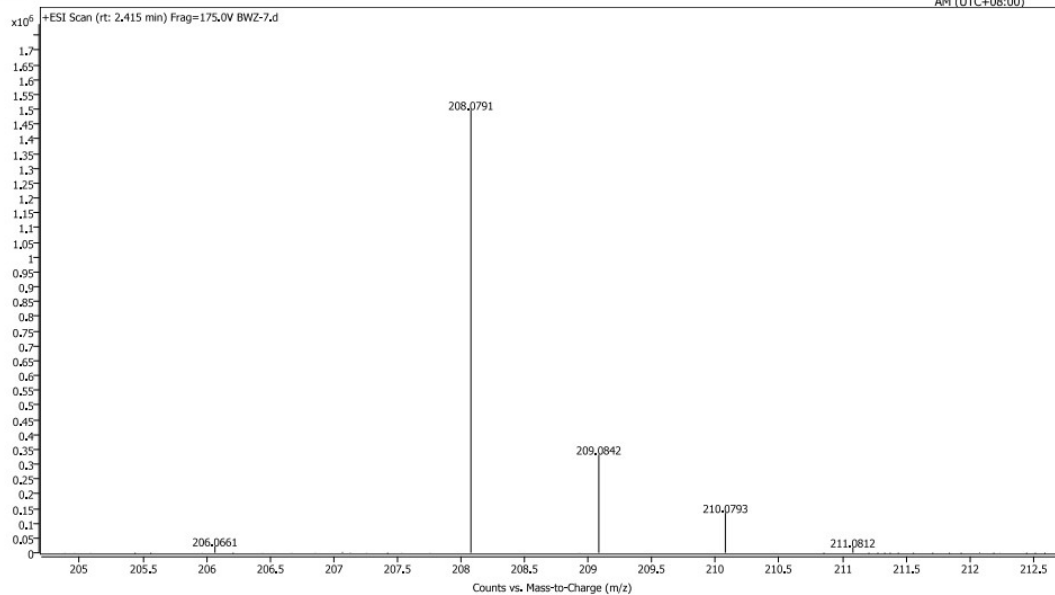

Page 1 of 1

Generated at 1:55 PM on 12/12/2021

## HRMS spectrum of compound 3w

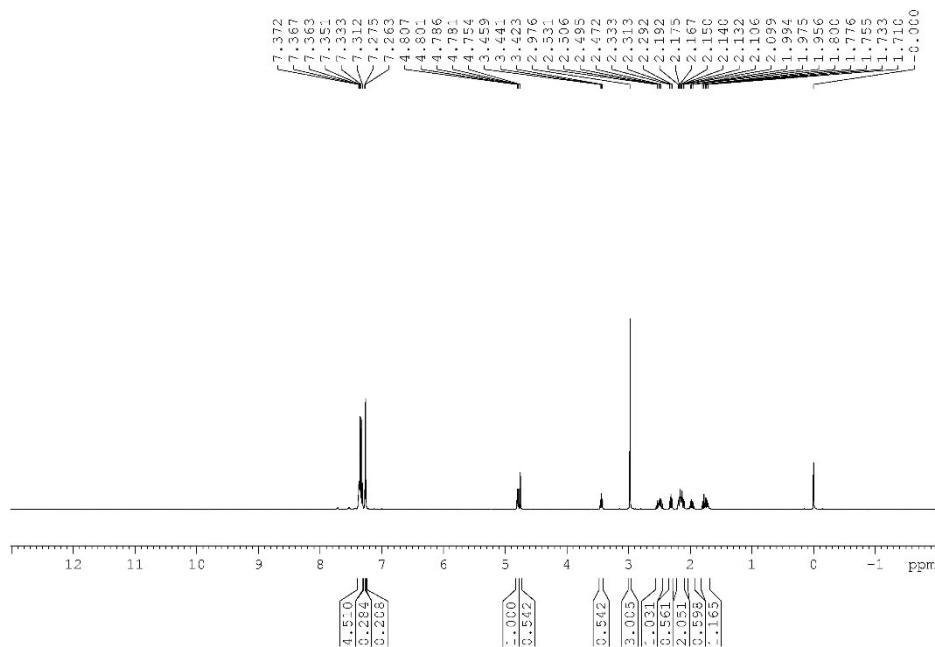

## <sup>1</sup>H NMR spectrum of compound 3x

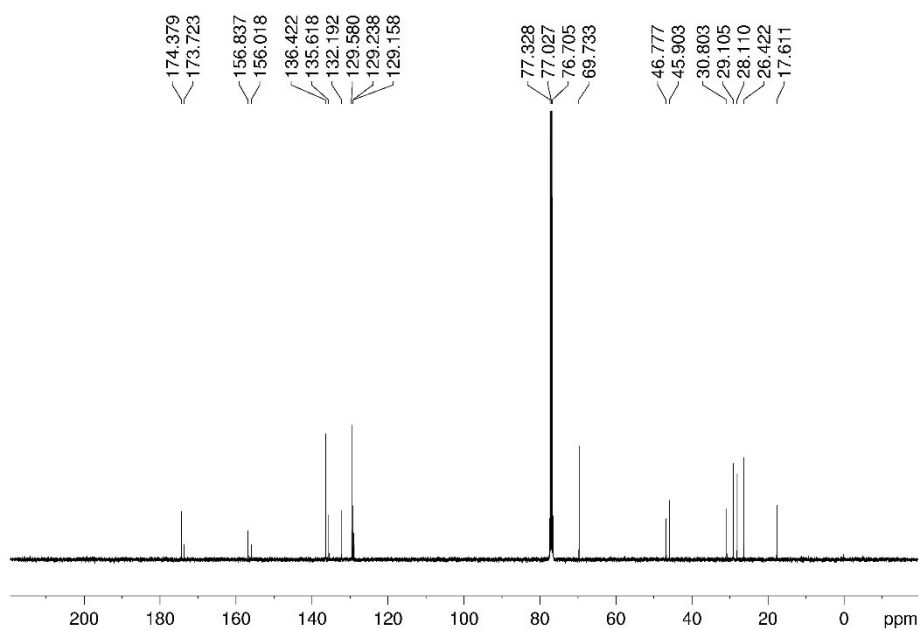

<sup>13</sup>C NMR spectrum of compound **3x**

### Spectrum Plot Report

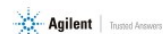

| Name           | bwz-5   | Rack Pos.    | Instrument           | Instrument 1 | Operator                                             |
|----------------|---------|--------------|----------------------|--------------|------------------------------------------------------|
| Inj. Vol. (ul) | 2       | Plate Pos.   | IRM Status           | Success      |                                                      |
| Data File      | BWZ-5.d | Method (Acq) | 20211212-bwz-4 min.m | Comment      | Acq. Time (Local) 12/12/2021 10:19:02 AM (UTC+08:00) |

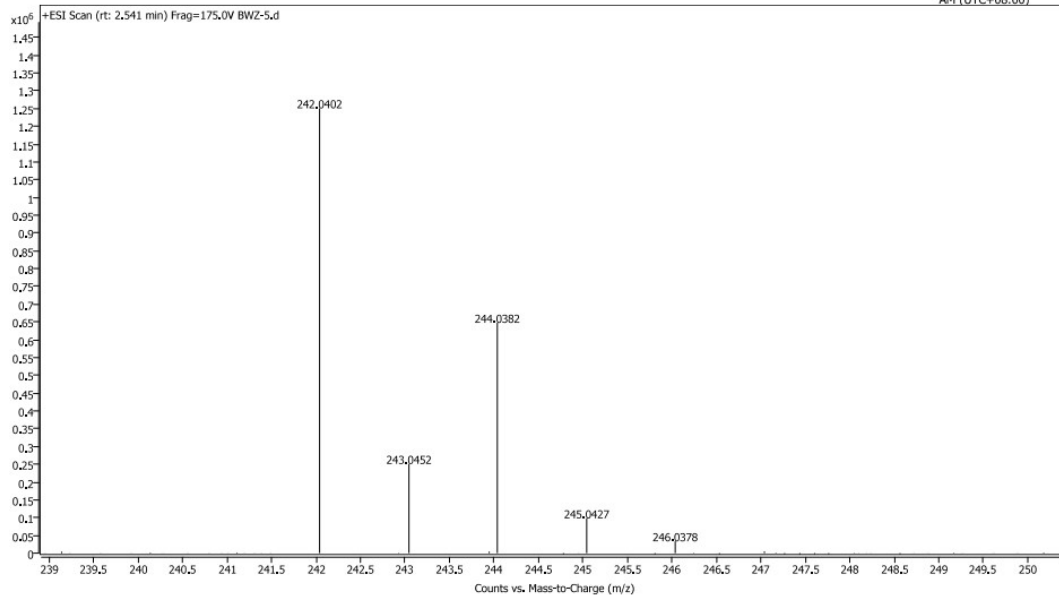

HRMS spectrum of compound **3x**

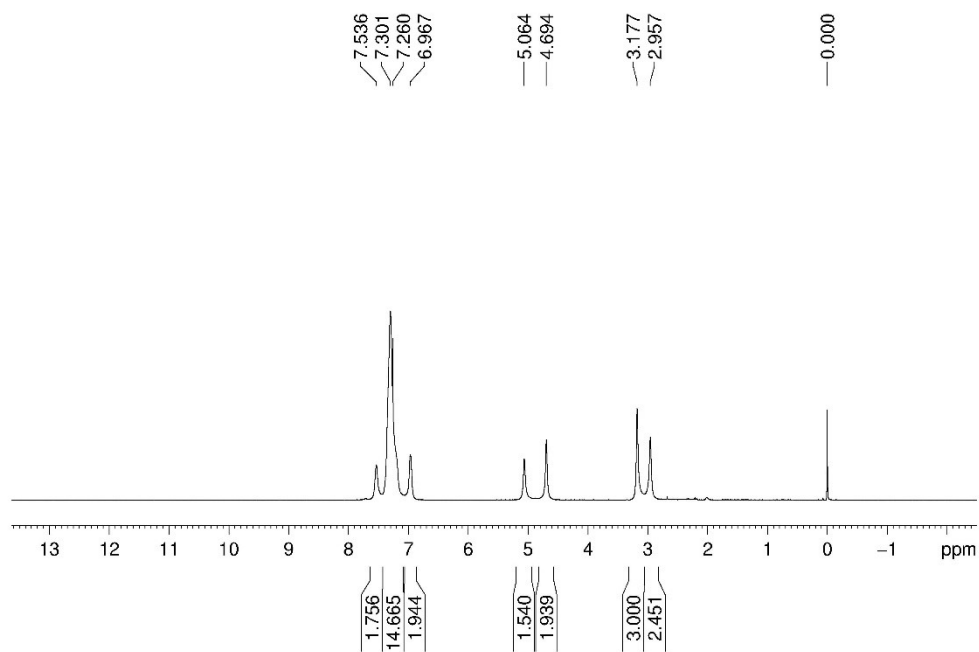

$^1\text{H}$  NMR spectrum of compound **3y**

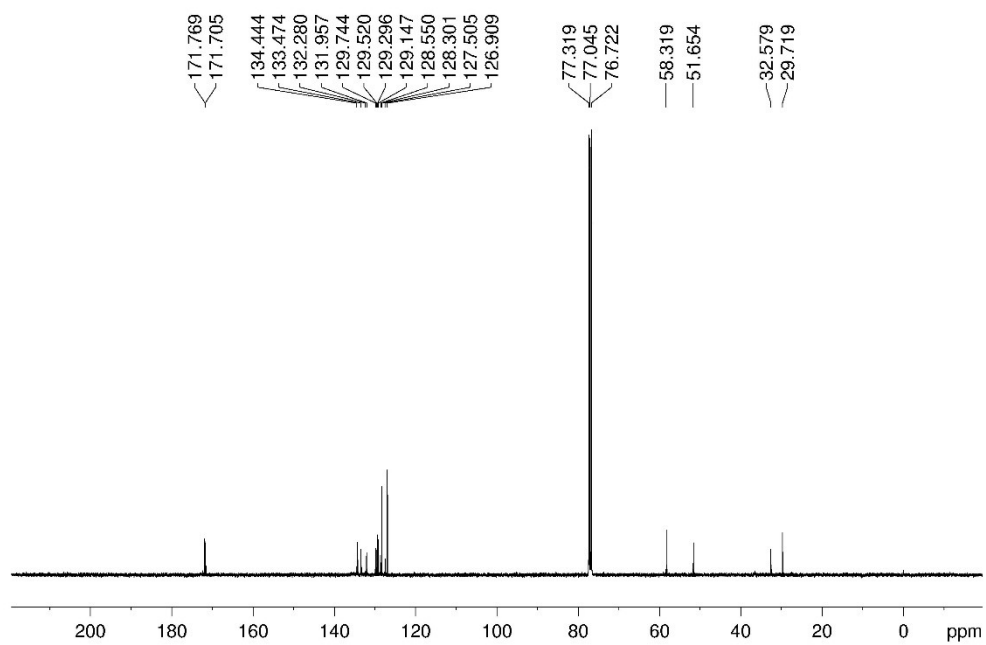

$^{13}\text{C}$  NMR spectrum of compound **3y**

# Spectrum Plot Report

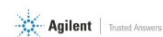

|                |         |              |               |            |              |                   |                                  |
|----------------|---------|--------------|---------------|------------|--------------|-------------------|----------------------------------|
| Name           | BWZ-1   | Rack Pos.    |               | Instrument | Instrument 1 | Operator          |                                  |
| Inj. Vol. (ul) | 2       | Plate Pos.   |               | IRM Status | Success      |                   |                                  |
| Data File      | BWZ-1.d | Method (Acq) | bwz20220413.m | Comment    |              | Acq. Time (Local) | 4/13/2022 8:20:42 PM (UTC+08:00) |

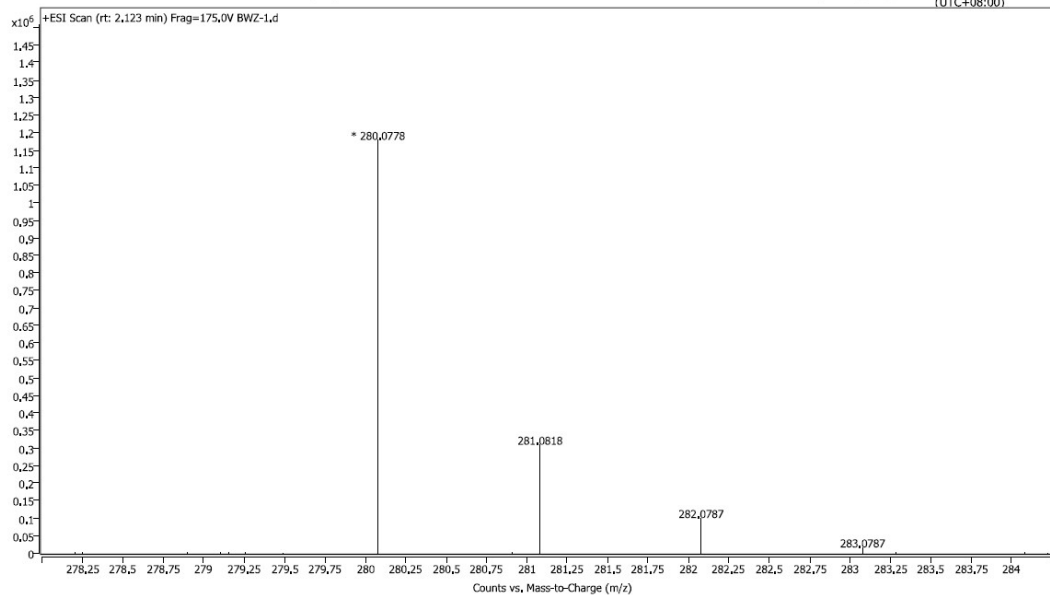

## HRMS spectrum of compound **3y**
